# Supplementary material for: Immune genes are associated with human glioblastoma pathology and patient survival
Source: PubMed Central journal article supplement (PMC3507656; doi:10.1186/1755-8794-5-41), 2012-09-14
Supplement: 1755-8794-5-41-S1.pdf [file 1755-8794-5-41-S1.pdf]

|    | <b>Gene Name</b> | <b>UniGene ID</b> | <b>Gene ID</b> | <b>Description</b>                                                                |
|----|------------------|-------------------|----------------|-----------------------------------------------------------------------------------|
| 1  | ABCC9            | Hs.446050         | 10060          | ATP-binding cassette, sub-family C (CFTR/MRP), member 9                           |
| 2  | ACE              | Hs.654434         | 1636           | Angiotensin I converting enzyme (peptidyl-dipeptidase A) 1                        |
| 3  | ACVR1B           | Hs.438918         | 91             | Activin A receptor, type IB                                                       |
| 4  | ACVR2A           | Hs.470174         | 92             | Activin A receptor, type IIA                                                      |
| 5  | ADA              | Hs.654536         | 100            | Adenosine deaminase                                                               |
| 6  | ADAM10           | Hs.578508         | 102            | ADAM metallopeptidase domain 10                                                   |
| 7  | ADAM17           | Hs.404914         | 6868           | ADAM metallopeptidase domain 17 (tumor necrosis factor, alpha, converting enzyme) |
| 8  | ADAM19           | Hs.483944         | 8728           | ADAM metallopeptidase domain 19 (meltrin beta)                                    |
| 9  | ADAM9            | Hs.591852         | 8754           | ADAM metallopeptidase domain 9 (meltrin gamma)                                    |
| 10 | ADAMDEC1         | Hs.521459         | 27299          | ADAM-like, decysin 1                                                              |
| 11 | ADIPOQ           | Hs.80485          | 9370           | Adiponectin, C1Q and collagen domain containing                                   |
| 12 | ADSS             | Hs.498313         | 159            | Adenylosuccinate synthase                                                         |
| 13 | AICDA            | Hs.149342         | 57379          | Activation-induced cytidine deaminase                                             |
| 14 | AIM2             | Hs.281898         | 9447           | Absent in melanoma 2                                                              |
| 15 | AIMP1            | Hs.591680         | 9255           | Aminoacyl tRNA synthase complex-interacting multifunctional protein 1             |
| 16 | AKAP17A          | Hs.522572         | 8227           | A-kinase anchor protein 17A                                                       |
| 17 | AKT1             | Hs.525622         | 207            | V-akt murine thymoma viral oncogene homolog 1                                     |
| 18 | ALAS2            | Hs.522666         | 212            | Aminolevulinate, delta-, synthase 2 (sideroblastic/hypochromic anemia)            |
| 19 | AMBP             | Hs.436911         | 259            | Alpha-1-microglobulin/bikunin precursor                                           |
| 20 | ANXA11           | Hs.530291         | 311            | Annexin A11                                                                       |
| 21 | AP2A2            | Hs.19121          | 161            | Adaptor-related protein complex 2, alpha 2 subunit                                |
| 22 | AP2B1            | Hs.514819         | 163            | Adaptor-related protein complex 2, beta 1 subunit                                 |
| 23 | AP2M1            | Hs.518460         | 1173           | Adaptor-related protein complex 2, mu 1 subunit                                   |
| 24 | AP2S1            | Hs.119591         | 1175           | Adaptor-related protein complex 2, sigma 1 subunit                                |
| 25 | APOA1            | Hs.633003         | 335            | Apolipoprotein A-I                                                                |
| 26 | APOA2            | Hs.237658         | 336            | Apolipoprotein A-II                                                               |
| 27 | APOA4            | Hs.591940         | 337            | Apolipoprotein A-IV                                                               |
| 28 | APOBEC3F         | Hs.659991         | 200316         | Apolipoprotein B mRNA editing enzyme, catalytic polypeptide-like 3F               |
| 29 | APOBEC3G         | Hs.660143         | 60489          | Apolipoprotein B mRNA editing enzyme, catalytic polypeptide-like 3G               |
| 30 | APOL1            | Hs.114309         | 8542           | Apolipoprotein L, 1                                                               |
| 31 | AQP3             | Hs.234642         | 360            | Aquaporin 3 (Gill blood group)                                                    |
| 32 | AQP9             | Hs.104624         | 366            | Aquaporin 9                                                                       |
| 33 | ARG1             | Hs.440934         | 383            | Arginase, liver                                                                   |
| 34 | ARG2             | Hs.705408         | 384            | Arginase, type II                                                                 |
| 35 | ARHGDI3          | Hs.504877         | 397            | Rho GDP dissociation inhibitor (GDI) beta                                         |
| 36 | ARNT             | Hs.632446         | 405            | Aryl hydrocarbon receptor nuclear translocator                                    |
| 37 | ASH2L            | Hs.521530         | 9070           | Ash2 (absent, small, or homeotic)-like (Drosophila)                               |
| 38 | ATP6V0A2         | Hs.201939         | 23545          | ATPase, H+ transporting, lysosomal V0 subunit a2                                  |
| 39 | ATP6V1H          | Hs.491737         | 51606          | ATPase, H+ transporting, lysosomal 50/57kDa, V1 subunit H                         |
| 40 | ATP7A            | Hs.496414         | 538            | ATPase, Cu++ transporting, alpha polypeptide (Menkes syndrome)                    |
| 41 | AZU1             | Hs.72885          | 566            | Azurocidin 1 (cationic antimicrobial protein 37)                                  |
| 42 | B9D2             | Hs.567596         | 80776          | B9 protein domain 2                                                               |
| 43 | BCAP31           | Hs.522817         | 10134          | B-cell receptor-associated protein 31                                             |
| 44 | BCL10            | Hs.193516         | 8915           | B-cell CLL/lymphoma 10                                                            |
| 45 | BCL11A           | Hs.370549         | 53335          | B-cell CLL/lymphoma 11A (zinc finger protein)                                     |
| 46 | BCL2             | Hs.150749         | 596            | B-cell CLL/lymphoma 2                                                             |
| 47 | BCL6             | Hs.478588         | 604            | B-cell CLL/lymphoma 6 (zinc finger protein 51)                                    |
| 48 | BGLAP            | Hs.654541         | 632            | Bone gamma-carboxyglutamate (gla) protein (osteocalcin)                           |
| 49 | BLNK             | Hs.665244         | 29760          | B-cell linker                                                                     |
| 50 | BMP6             | Hs.285671         | 654            | Bone morphogenetic protein 6                                                      |
| 51 | BMPR1A           | Hs.524477         | 657            | Bone morphogenetic protein receptor, type IA                                      |
| 52 | BNIP3            | Hs.144873         | 664            | BCL2/adenovirus E1B 19kDa interacting protein 3                                   |
| 53 | BNIP3L           | Hs.131226         | 665            | BCL2/adenovirus E1B 19kDa interacting protein 3-like                              |
| 54 | BPI              | Hs.529019         | 671            | Bactericidal/permeability-increasing protein                                      |
| 55 | BST1             | Hs.169998         | 683            | Bone marrow stromal cell antigen 1                                                |
| 56 | BST2             | Hs.118110         | 684            | Bone marrow stromal cell antigen 2                                                |
| 57 | C1QBP            | Hs.555866         | 708            | Complement component 1, q subcomponent binding protein                            |

|     |          |           |       |                                                                      |
|-----|----------|-----------|-------|----------------------------------------------------------------------|
| 58  | C2       | Hs.408903 | 717   | Complement component 2                                               |
| 59  | C3       | Hs.529053 | 718   | Complement component 3                                               |
| 60  | C5AR1    | Hs.2161   | 728   | Complement component 5a receptor 1                                   |
| 61  | CADM1    | Hs.370510 | 23705 | Cell adhesion molecule 1                                             |
| 62  | CALCA    | Hs.37058  | 796   | Calcitonin/calcitonin-related polypeptide, alpha                     |
| 63  | CALCOCO2 | Hs.514920 | 10241 | Calcium binding and coiled-coil domain 2                             |
| 64  | CALR     | Hs.515162 | 811   | Calreticulin                                                         |
| 65  | CARTPT   | Hs.1707   | 9607  | CART prepropeptide                                                   |
| 66  | CGBP2    | Hs.146346 | 1238  | Chemokine binding protein 2                                          |
| 67  | CCL1     | Hs.72918  | 6346  | Chemokine (C-C motif) ligand 1                                       |
| 68  | CCL11    | Hs.54460  | 6356  | Chemokine (C-C motif) ligand 11                                      |
| 69  | CCL13    | Hs.414629 | 6357  | Chemokine (C-C motif) ligand 13                                      |
| 70  | CCL16    | Hs.10458  | 6360  | Chemokine (C-C motif) ligand 16                                      |
| 71  | CCL17    | Hs.546294 | 6361  | Chemokine (C-C motif) ligand 17                                      |
| 72  | CCL18    | Hs.143961 | 6362  | Chemokine (C-C motif) ligand 18 (pulmonary and activation-regulated) |
| 73  | CCL19    | Hs.50002  | 6363  | Chemokine (C-C motif) ligand 19                                      |
| 74  | CCL2     | Hs.303649 | 6347  | Chemokine (C-C motif) ligand 2                                       |
| 75  | CCL20    | Hs.75498  | 6364  | Chemokine (C-C motif) ligand 20                                      |
| 76  | CCL21    | Hs.57907  | 6366  | Chemokine (C-C motif) ligand 21                                      |
| 77  | CCL22    | Hs.534347 | 6367  | Chemokine (C-C motif) ligand 22                                      |
| 78  | CCL23    | Hs.169191 | 6368  | Chemokine (C-C motif) ligand 23                                      |
| 79  | CCL24    | Hs.247838 | 6369  | Chemokine (C-C motif) ligand 24                                      |
| 80  | CCL25    | Hs.310511 | 6370  | Chemokine (C-C motif) ligand 25                                      |
| 81  | CCL27    | Hs.459590 | 10850 | Chemokine (C-C motif) ligand 27                                      |
| 82  | CCL4     | Hs.75703  | 6351  | Chemokine (C-C motif) ligand 4                                       |
| 83  | CCL5     | Hs.514821 | 6352  | Chemokine (C-C motif) ligand 5                                       |
| 84  | CCL7     | Hs.251526 | 6354  | Chemokine (C-C motif) ligand 7                                       |
| 85  | CCL8     | Hs.699804 | 6355  | Chemokine (C-C motif) ligand 8                                       |
| 86  | CCR1     | Hs.301921 | 1230  | Chemokine (C-C motif) receptor 1                                     |
| 87  | CCR10    | Hs.703555 | 2826  | Chemokine (C-C motif) receptor 10                                    |
| 88  | CCR2     | Hs.644637 | 1231  | Chemokine (C-C motif) receptor 2                                     |
| 89  | CCR3     | Hs.506190 | 1232  | Chemokine (C-C motif) receptor 3                                     |
| 90  | CCR4     | Hs.184926 | 1233  | Chemokine (C-C motif) receptor 4                                     |
| 91  | CCR5     | Hs.450802 | 1234  | Chemokine (C-C motif) receptor 5                                     |
| 92  | CCR6     | Hs.46468  | 1235  | Chemokine (C-C motif) receptor 6                                     |
| 93  | CCR7     | Hs.370036 | 1236  | Chemokine (C-C motif) receptor 7                                     |
| 94  | CCR8     | Hs.113222 | 1237  | Chemokine (C-C motif) receptor 8                                     |
| 95  | CCR9     | Hs.225946 | 10803 | Chemokine (C-C motif) receptor 9                                     |
| 96  | CCRL1    | Hs.310512 | 51554 | Chemokine (C-C motif) receptor-like 1                                |
| 97  | CCRL2    | Hs.535713 | 9034  | Chemokine (C-C motif) receptor-like 2                                |
| 98  | CD14     | Hs.163867 | 929   | CD14 molecule                                                        |
| 99  | CD163    | Hs.504641 | 9332  | CD163 molecule                                                       |
| 100 | CD164    | Hs.520313 | 8763  | CD164 molecule, sialomucin                                           |
| 101 | CD19     | Hs.652262 | 930   | CD19 molecule                                                        |
| 102 | CD1A     | Hs.1309   | 909   | CD1a molecule                                                        |
| 103 | CD1D     | Hs.1799   | 912   | CD1d molecule                                                        |
| 104 | CD1E     | Hs.249217 | 913   | CD1e molecule                                                        |
| 105 | CD2      | Hs.523500 | 914   | CD2 molecule                                                         |
| 106 | CD200    | Hs.79015  | 4345  | CD200 molecule                                                       |
| 107 | CD207    | Hs.199731 | 50489 | CD207 molecule, langerin                                             |
| 108 | CD209    | Hs.278694 | 30835 | CD209 molecule                                                       |
| 109 | CD22     | Hs.643440 | 933   | CD22 molecule                                                        |
| 110 | CD226    | Hs.660130 | 10666 | CD226 molecule                                                       |
| 111 | CD24     | Hs.644105 | 934   | CD24 molecule                                                        |
| 112 | CD244    | Hs.157872 | 51744 | CD244 molecule, natural killer cell receptor 2B4                     |
| 113 | CD247    | Hs.156445 | 919   | CD247 molecule                                                       |
| 114 | CD27     | Hs.355307 | 939   | CD27 molecule                                                        |
| 115 | CD28     | Hs.591629 | 940   | CD28 molecule                                                        |

|     |         |           |       |                                                                                  |
|-----|---------|-----------|-------|----------------------------------------------------------------------------------|
| 116 | CD302   | Hs.130014 | 9936  | CD302 molecule                                                                   |
| 117 | CD320   | Hs.558499 | 51293 | CD320 molecule                                                                   |
| 118 | CD33    | Hs.83731  | 945   | CD33 molecule                                                                    |
| 119 | CD34    | Hs.374990 | 947   | CD34 molecule                                                                    |
| 120 | CD3D    | Hs.504048 | 915   | CD3d molecule, delta (CD3-TCR complex)                                           |
| 121 | CD3E    | Hs.3003   | 916   | CD3e molecule, epsilon (CD3-TCR complex)                                         |
| 122 | CD3EAP  | Hs.705916 | 10849 | CD3e molecule, epsilon associated protein                                        |
| 123 | CD3G    | Hs.2259   | 917   | CD3g molecule, gamma (CD3-TCR complex)                                           |
| 124 | CD4     | Hs.631659 | 920   | CD4 molecule                                                                     |
| 125 | CD40    | Hs.472860 | 958   | CD40 molecule, TNF receptor superfamily member 5                                 |
| 126 | CD40LG  | Hs.592244 | 959   | CD40 ligand (TNF superfamily, member 5, hyper-IgM syndrome)                      |
| 127 | CD44    | Hs.502328 | 960   | CD44 molecule (Indian blood group)                                               |
| 128 | CD47    | Hs.446414 | 961   | CD47 molecule                                                                    |
| 129 | CD69    | Hs.208854 | 969   | CD69 molecule                                                                    |
| 130 | CD7     | Hs.36972  | 924   | CD7 molecule                                                                     |
| 131 | CD70    | Hs.501497 | 970   | CD70 molecule                                                                    |
| 132 | CD74    | Hs.436568 | 972   | CD74 molecule, major histocompatibility complex, class II invariant chain        |
| 133 | CD79A   | Hs.631567 | 973   | CD79a molecule, immunoglobulin-associated alpha                                  |
| 134 | CD79B   | Hs.89575  | 974   | CD79b molecule, immunoglobulin-associated beta                                   |
| 135 | CD83    | Hs.654558 | 9308  | CD83 molecule                                                                    |
| 136 | CD86    | Hs.171182 | 942   | CD86 molecule                                                                    |
| 137 | CD8A    | Hs.85258  | 925   | CD8a molecule                                                                    |
| 138 | CD8B    | Hs.405667 | 926   | CD8b molecule                                                                    |
| 139 | CD93    | Hs.97199  | 22918 | CD93 molecule                                                                    |
| 140 | CD96    | Hs.142023 | 10225 | CD96 molecule                                                                    |
| 141 | CD97    | Hs.466039 | 976   | CD97 molecule                                                                    |
| 142 | CD99    | Hs.654354 | 4267  | CD99 molecule                                                                    |
| 143 | CDC42   | Hs.690198 | 998   | Cell division cycle 42 (GTP binding protein, 25kDa)                              |
| 144 | CDH15   | Hs.148090 | 1013  | Cadherin 15, M-cadherin (myotubule)                                              |
| 145 | CDK6    | Hs.119882 | 1021  | Cyclin-dependent kinase 6                                                        |
| 146 | CDKN2A  | Hs.512599 | 1029  | Cyclin-dependent kinase inhibitor 2A (melanoma, p16, inhibits CDK4)              |
| 147 | CEACAM1 | Hs.512682 | 634   | Carcinoembryonic antigen-related cell adhesion molecule 1 (biliary glycoprotein) |
| 148 | CEACAM8 | Hs.41     | 1088  | Carcinoembryonic antigen-related cell adhesion molecule 8                        |
| 149 | CEBPA   | Hs.699463 | 1050  | CCAAT/enhancer binding protein (C/EBP), alpha                                    |
| 150 | CEBPB   | Hs.517106 | 1051  | CCAAT/enhancer binding protein (C/EBP), beta                                     |
| 151 | CEBPG   | Hs.429666 | 1054  | CCAAT/enhancer binding protein (C/EBP), gamma                                    |
| 152 | CFB     | Hs.69771  | 629   | Complement factor B                                                              |
| 153 | CFD     | Hs.155597 | 1675  | Complement factor D (adipsin)                                                    |
| 154 | CFHR5   | Hs.282594 | 81494 | Complement factor H-related 5                                                    |
| 155 | CFP     | Hs.53155  | 5199  | Complement factor properdin                                                      |
| 156 | CHD7    | Hs.20395  | 55636 | Chromodomain helicase DNA binding protein 7                                      |
| 157 | CHIA    | Hs.128814 | 27159 | Chitinase, acidic                                                                |
| 158 | CHIT1   | Hs.201688 | 1118  | Chitinase 1 (chitotriosidase)                                                    |
| 159 | CHRNA4  | Hs.10734  | 1137  | Cholinergic receptor, nicotinic, alpha 4                                         |
| 160 | CHRNB2  | Hs.2306   | 1141  | Cholinergic receptor, nicotinic, beta 2 (neuronal)                               |
| 161 | CHST4   | Hs.251383 | 10164 | Carbohydrate (N-acetylglucosamine 6-O) sulfotransferase 4                        |
| 162 | CHUK    | Hs.198998 | 1147  | Conserved helix-loop-helix ubiquitous kinase                                     |
| 163 | CIITA   | Hs.701991 | 4261  | Class II, major histocompatibility complex, transactivator                       |
| 164 | CKLF    | Hs.15159  | 51192 | Chemokine-like factor                                                            |
| 165 | CLEC10A | Hs.54403  | 10462 | C-type lectin domain family 10, member A                                         |
| 166 | CLEC11A | Hs.512680 | 6320  | C-type lectin domain family 11, member A                                         |
| 167 | CLEC16A | Hs.35490  | 23274 | C-type lectin domain family 16, member A                                         |
| 168 | CLEC1A  | Hs.29549  | 51267 | C-type lectin domain family 1, member A                                          |
| 169 | CLEC1B  | Hs.409794 | 51266 | C-type lectin domain family 1, member B                                          |
| 170 | CLEC2B  | Hs.85201  | 9976  | C-type lectin domain family 2, member B                                          |
| 171 | CLEC2D  | Hs.268326 | 29121 | C-type lectin domain family 2, member D                                          |
| 172 | CLEC3B  | Hs.476092 | 7123  | C-type lectin domain family 3, member B                                          |
| 173 | CLEC4A  | Hs.504657 | 50856 | C-type lectin domain family 4, member A                                          |

|     |          |           |           |                                                                                                    |
|-----|----------|-----------|-----------|----------------------------------------------------------------------------------------------------|
| 174 | CLEC4E   | Hs.236516 | 26253     | C-type lectin domain family 4, member E                                                            |
| 175 | CLEC4M   | Hs.421437 | 10332     | C-type lectin domain family 4, member M                                                            |
| 176 | CLEC5A   | Hs.446235 | 23601     | C-type lectin domain family 5, member A                                                            |
| 177 | CLEC7A   | Hs.143929 | 64581     | C-type lectin domain family 7, member A                                                            |
| 178 | CLPTM1   | Hs.444441 | 1209      | Cleft lip and palate associated transmembrane protein 1                                            |
| 179 | CMKLR1   | Hs.506659 | 1240      | Chemokine-like receptor 1                                                                          |
| 180 | CMTM6    | Hs.380627 | 54918     | CKLF-like MARVEL transmembrane domain containing 6                                                 |
| 181 | CNIH     | Hs.294603 | 10175     | Cornichon homolog (Drosophila)                                                                     |
| 182 | CNR2     | Hs.73037  | 1269      | Cannabinoid receptor 2 (macrophage)                                                                |
| 183 | COL3A1   | Hs.443625 | 1281      | Collagen, type III, alpha 1 (Ehlers-Danlos syndrome type IV, autosomal dominant)                   |
| 184 | COL4A3BP | Hs.270437 | 10087     | Collagen, type IV, alpha 3 (Goodpasture antigen) binding protein                                   |
| 185 | COLEC12  | Hs.464422 | 81035     | Collectin sub-family member 12                                                                     |
| 186 | CORO1A   | Hs.415067 | 11151     | Coronin, actin binding protein, 1A                                                                 |
| 187 | CRHR1    | Hs.417628 | 1394      | Corticotropin releasing hormone receptor 1                                                         |
| 188 | CRISP3   | Hs.404466 | 10321     | Cysteine-rich secretory protein 3                                                                  |
| 189 | CRP      | Hs.76452  | 1401      | C-reactive protein, pentraxin-related                                                              |
| 190 | CRTAM    | Hs.159523 | 56253     | Cytotoxic and regulatory T cell molecule                                                           |
| 191 | CSF1     | Hs.591402 | 1435      | Colony stimulating factor 1 (macrophage)                                                           |
| 192 | CSF1R    | Hs.654394 | 1436      | Colony stimulating factor 1 receptor, formerly McDonough feline sarcoma viral (v-fms) oncogene hom |
| 193 | CSF2     | Hs.1349   | 1437      | Colony stimulating factor 2 (granulocyte-macrophage)                                               |
| 194 | CSF2RA   | Hs.520937 | 1438      | Colony stimulating factor 2 receptor, alpha, low-affinity (granulocyte-macrophage)                 |
| 195 | CSF2RB   | Hs.592192 | 1439      | Colony stimulating factor 2 receptor, beta, low-affinity (granulocyte-macrophage)                  |
| 196 | CSF3     | Hs.2233   | 1440      | Colony stimulating factor 3 (granulocyte)                                                          |
| 197 | CSF3R    | Hs.524517 | 1441      | Colony stimulating factor 3 receptor (granulocyte)                                                 |
| 198 | CST7     | Hs.143212 | 8530      | Cystatin F (leukocystatin)                                                                         |
| 199 | CTLA4    | Hs.247824 | 1493      | Cytotoxic T-lymphocyte-associated protein 4                                                        |
| 200 | CTSC     | Hs.128065 | 1075      | Cathepsin C                                                                                        |
| 201 | CTSE     | Hs.701979 | 1510      | Cathepsin E                                                                                        |
| 202 | CTSG     | Hs.421724 | 1511      | Cathepsin G                                                                                        |
| 203 | CTSS     | Hs.181301 | 1520      | Cathepsin S                                                                                        |
| 204 | CTSW     | Hs.416848 | 1521      | Cathepsin W                                                                                        |
| 205 | CX3CL1   | Hs.531668 | 6376      | Chemokine (C-X3-C motif) ligand 1                                                                  |
| 206 | CX3CR1   | Hs.78913  | 1524      | Chemokine (C-X3-C motif) receptor 1                                                                |
| 207 | CXADR    | Hs.705503 | 1525      | Coxsackie virus and adenovirus receptor                                                            |
| 208 | CXCL10   | Hs.632586 | 3627      | Chemokine (C-X-C motif) ligand 10                                                                  |
| 209 | CXCL11   | Hs.632592 | 6373      | Chemokine (C-X-C motif) ligand 11                                                                  |
| 210 | CXCL12   | Hs.522891 | 6387      | Chemokine (C-X-C motif) ligand 12 (stromal cell-derived factor 1)                                  |
| 211 | CXCL13   | Hs.100431 | 10563     | Chemokine (C-X-C motif) ligand 13 (B-cell chemoattractant)                                         |
| 212 | CXCL14   | Hs.483444 | 9547      | Chemokine (C-X-C motif) ligand 14                                                                  |
| 213 | CXCL2    | Hs.590921 | 2920      | Chemokine (C-X-C motif) ligand 2                                                                   |
| 214 | CXCL3    | Hs.89690  | 2921      | Chemokine (C-X-C motif) ligand 3                                                                   |
| 215 | CXCL5    | Hs.89714  | 6374      | Chemokine (C-X-C motif) ligand 5                                                                   |
| 216 | CXCL6    | Hs.164021 | 6372      | Chemokine (C-X-C motif) ligand 6 (granulocyte chemotactic protein 2)                               |
| 217 | CXCL9    | Hs.77367  | 4283      | Chemokine (C-X-C motif) ligand 9                                                                   |
| 218 | CXCR1    | Hs.194778 | 3577      | Chemokine (C-X-C motif) receptor 1                                                                 |
| 219 | CXCR2    | Hs.846    | 3579      | Chemokine (C-X-C motif) receptor 2                                                                 |
| 220 | CXCR3    | Hs.198252 | 2833      | Chemokine (C-X-C motif) receptor 3                                                                 |
| 221 | CXCR4    | Hs.593413 | 7852      | Chemokine (C-X-C motif) receptor 4                                                                 |
| 222 | CXCR5    | Hs.113916 | 643       | Chemokine (C-X-C motif) receptor 5                                                                 |
| 223 | CXCR6    | Hs.34526  | 10663     | Chemokine (C-X-C motif) receptor 6                                                                 |
| 224 | CXCR7    | Hs.471751 | 57007     | Chemokine (C-X-C motif) receptor 7                                                                 |
| 225 | CYBA     | Hs.513803 | 1535      | Cytochrome b-245, alpha polypeptide                                                                |
| 226 | CYBB     | Hs.292356 | 1536      | Cytochrome b-245, beta polypeptide (chronic granulomatous disease)                                 |
| 227 | CYP11B1  | Hs.184927 | 1584      | Cytochrome P450, family 11, subfamily B, polypeptide 1                                             |
| 228 | CYSLTR2  | Hs.253706 | 57105     | Cysteinyl leukotriene receptor 2                                                                   |
| 229 | DCAF15   | Hs.443636 | 90379     | DDB1- and CUL4-associated factor 15                                                                |
| 230 | DDOST    | Hs.523145 | 1650      | Dolichyl-diphosphooligosaccharide-protein glycosyltransferase                                      |
| 231 | DEFB4A   | Hs.740237 | 100289462 | Defensin beta 4A                                                                                   |

|     |        |           |       |                                                                                                        |
|-----|--------|-----------|-------|--------------------------------------------------------------------------------------------------------|
| 232 | DHRS2  | Hs.272499 | 10202 | Dehydrogenase/reductase (SDR family) member 2                                                          |
| 233 | DMBT1  | Hs.279611 | 1755  | Deleted in malignant brain tumors 1                                                                    |
| 234 | DOCK2  | Hs.586174 | 1794  | Dedicator of cytokinesis 2                                                                             |
| 235 | DPP4   | Hs.368912 | 1803  | Dipeptidyl-peptidase 4 (CD26, adenosine deaminase complexing protein 2)                                |
| 236 | DPP8   | Hs.591106 | 54878 | Dipeptidyl-peptidase 8                                                                                 |
| 237 | DYRK3  | Hs.164267 | 8444  | Dual-specificity tyrosine-(Y)-phosphorylation regulated kinase 3                                       |
| 238 | EBI3   | Hs.501452 | 10148 | Epstein-Barr virus induced gene 3                                                                      |
| 239 | EDA    | Hs.105407 | 1896  | Ectodysplasin A                                                                                        |
| 240 | EDA2R  | Hs.302017 | 60401 | Ectodysplasin A2 receptor                                                                              |
| 241 | EDAR   | Hs.171971 | 10913 | Ectodysplasin A receptor                                                                               |
| 242 | EDN1   | Hs.511899 | 1906  | Endothelin 1                                                                                           |
| 243 | EDN2   | Hs.1407   | 1907  | Endothelin 2                                                                                           |
| 244 | EDN3   | Hs.1408   | 1908  | Endothelin 3                                                                                           |
| 245 | EDNRB  | Hs.82002  | 1910  | Endothelin receptor type B                                                                             |
| 246 | EGF    | Hs.419815 | 1950  | Epidermal growth factor (beta-urogastrone)                                                             |
| 247 | EGFR   | Hs.488293 | 1956  | Epidermal growth factor receptor (erythroblastic leukemia viral (v-erb-b) oncogene homolog, avian)     |
| 248 | ELF4   | Hs.271940 | 2000  | E74-like factor 4 (ets domain transcription factor)                                                    |
| 249 | EPHB6  | Hs.380089 | 2051  | EPH receptor B6                                                                                        |
| 250 | ERAP1  | Hs.436186 | 51752 | Endoplasmic reticulum aminopeptidase 1                                                                 |
| 251 | ERAP2  | Hs.591249 | 64167 | Endoplasmic reticulum aminopeptidase 2                                                                 |
| 252 | ERBB2  | Hs.446352 | 2064  | V-erb-b2 erythroblastic leukemia viral oncogene homolog 2, neuro/glioblastoma derived oncogene homolog |
| 253 | ERBB3  | Hs.118681 | 2065  | V-erb-b2 erythroblastic leukemia viral oncogene homolog 3 (avian)                                      |
| 254 | ERBB4  | Hs.390729 | 2066  | V-erb-a erythroblastic leukemia viral oncogene homolog 4 (avian)                                       |
| 255 | EREG   | Hs.115263 | 2069  | Epiregulin                                                                                             |
| 256 | ETS1   | Hs.369438 | 2113  | V-ets erythroblastosis virus E26 oncogene homolog 1 (avian)                                            |
| 257 | EXOSC9 | Hs.91728  | 5393  | Exosome component 9                                                                                    |
| 258 | F12    | Hs.1321   | 2161  | Coagulation factor XII (Hageman factor)                                                                |
| 259 | FAS    | Hs.244139 | 355   | Fas (TNF receptor superfamily, member 6)                                                               |
| 260 | FASLG  | Hs.2007   | 356   | Fas ligand (TNF superfamily, member 6)                                                                 |
| 261 | FCAR   | Hs.659872 | 2204  | Fc fragment of IgA, receptor for                                                                       |
| 262 | FCGR1B | Hs.534956 | 2210  | Fc fragment of IgG, high affinity Ib, receptor (CD64)                                                  |
| 263 | FCGR2A | Hs.352642 | 2212  | Fc fragment of IgG, low affinity IIa, receptor (CD32)                                                  |
| 264 | FCGR2B | Hs.654395 | 2213  | Fc fragment of IgG, low affinity IIb, receptor (CD32)                                                  |
| 265 | FCGR2C | Hs.705497 | 9103  | Fc fragment of IgG, low affinity IIc, receptor for (CD32)                                              |
| 266 | FCGR3B | Hs.694258 | 2215  | Fc fragment of IgG, low affinity IIIb, receptor for (CD16)                                             |
| 267 | FCGRT  | Hs.111903 | 2217  | Fc fragment of IgG, receptor, transporter, alpha                                                       |
| 268 | FCN1   | Hs.440898 | 2219  | Ficolin (collagen/fibrinogen domain containing) 1                                                      |
| 269 | FCN2   | Hs.54517  | 2220  | Ficolin (collagen/fibrinogen domain containing lectin) 2 (hucolin)                                     |
| 270 | FGF1   | Hs.483635 | 2246  | Fibroblast growth factor 1 (acidic)                                                                    |
| 271 | FGF12  | Hs.584758 | 2257  | Fibroblast growth factor 12                                                                            |
| 272 | FGF13  | Hs.6540   | 2258  | Fibroblast growth factor 13                                                                            |
| 273 | FGF14  | Hs.696392 | 2259  | Fibroblast growth factor 14                                                                            |
| 274 | FGF16  | Hs.666364 | 8823  | Fibroblast growth factor 16                                                                            |
| 275 | FGF17  | Hs.248192 | 8822  | Fibroblast growth factor 17                                                                            |
| 276 | FGF18  | Hs.87191  | 8817  | Fibroblast growth factor 18                                                                            |
| 277 | FGF2   | Hs.284244 | 2247  | Fibroblast growth factor 2 (basic)                                                                     |
| 278 | FGF20  | Hs.199905 | 26281 | Fibroblast growth factor 20                                                                            |
| 279 | FGF21  | Hs.283015 | 26291 | Fibroblast growth factor 21                                                                            |
| 280 | FGF22  | Hs.248087 | 27006 | Fibroblast growth factor 22                                                                            |
| 281 | FGF23  | Hs.287370 | 8074  | Fibroblast growth factor 23                                                                            |
| 282 | FGF3   | Hs.37092  | 2248  | Fibroblast growth factor 3 (murine mammary tumor virus integration site (v-int-2) oncogene homolog)    |
| 283 | FGF5   | Hs.37055  | 2250  | Fibroblast growth factor 5                                                                             |
| 284 | FGF6   | Hs.166015 | 2251  | Fibroblast growth factor 6                                                                             |
| 285 | FGF7   | Hs.567268 | 2252  | Fibroblast growth factor 7 (keratinocyte growth factor)                                                |
| 286 | FGF8   | Hs.57710  | 2253  | Fibroblast growth factor 8 (androgen-induced)                                                          |
| 287 | FGF9   | Hs.111    | 2254  | Fibroblast growth factor 9 (glia-activating factor)                                                    |
| 288 | FGFR1  | Hs.264887 | 2260  | Fibroblast growth factor receptor 1 (fms-related tyrosine kinase 2, Pfeiffer syndrome)                 |
| 289 | FGFR2  | Hs.533683 | 2263  | Fibroblast growth factor receptor 2 (bacteria-expressed kinase, keratinocyte growth factor receptor, c |

|     |          |           |       |                                                                                                |
|-----|----------|-----------|-------|------------------------------------------------------------------------------------------------|
| 290 | FGFR3    | Hs.1420   | 2261  | Fibroblast growth factor receptor 3 (achondroplasia, thanatophoric dwarfism)                   |
| 291 | FGFR4    | Hs.165950 | 2264  | Fibroblast growth factor receptor 4                                                            |
| 292 | FIGF     | Hs.11392  | 2277  | C-fos induced growth factor (vascular endothelial growth factor D)                             |
| 293 | FKBP1A   | Hs.471933 | 2280  | FK506 binding protein 1A, 12kDa                                                                |
| 294 | FLT3     | Hs.507590 | 2322  | Fms-related tyrosine kinase 3                                                                  |
| 295 | FLT4     | Hs.646917 | 2324  | Fms-related tyrosine kinase 4                                                                  |
| 296 | FOXO3    | Hs.220950 | 2309  | Forkhead box O3                                                                                |
| 297 | FOXP3    | Hs.247700 | 50943 | Forkhead box P3                                                                                |
| 298 | FTH1     | Hs.524910 | 2495  | Ferritin, heavy polypeptide 1                                                                  |
| 299 | FUT4     | Hs.390420 | 2526  | Fucosyltransferase 4 (alpha (1,3) fucosyltransferase, myeloid-specific)                        |
| 300 | FUT9     | Hs.49117  | 10690 | Fucosyltransferase 9 (alpha (1,3) fucosyltransferase)                                          |
| 301 | FYB      | Hs.370503 | 2533  | FYN binding protein (FYB-120/130)                                                              |
| 302 | FYN      | Hs.390567 | 2534  | FYN oncogene related to SRC, FGR, YES                                                          |
| 303 | G6PD     | Hs.461047 | 2539  | Glucose-6-phosphate dehydrogenase                                                              |
| 304 | GALNT2   | Hs.654649 | 2590  | UDP-N-acetyl-alpha-D-galactosamine:polypeptide N-acetylgalactosaminyltransferase 2 (GalNAc-T2) |
| 305 | GBP2     | Hs.386567 | 2634  | Guanylate binding protein 2, interferon-inducible                                              |
| 306 | GCH1     | Hs.86724  | 2643  | GTP cyclohydrolase 1 (dopa-responsive dystonia)                                                |
| 307 | GEM      | Hs.654463 | 2669  | GTP binding protein overexpressed in skeletal muscle                                           |
| 308 | GFRA2    | Hs.441202 | 2675  | GDNF family receptor alpha 2                                                                   |
| 309 | GLMN     | Hs.49105  | 11146 | Glomulin, FKBP associated protein                                                              |
| 310 | GNL1     | Hs.83147  | 2794  | Guanine nucleotide binding protein-like 1                                                      |
| 311 | GNLY     | Hs.105806 | 10578 | Granulysin                                                                                     |
| 312 | GPI      | Hs.466471 | 2821  | Glucose phosphate isomerase                                                                    |
| 313 | GPR183   | Hs.784    | 1880  | G-protein coupled receptor 183                                                                 |
| 314 | GPR44    | Hs.299567 | 11251 | G protein-coupled receptor 44                                                                  |
| 315 | GPR65    | Hs.513440 | 8477  | G protein-coupled receptor 65                                                                  |
| 316 | GTPBP1   | Hs.276925 | 9567  | GTP binding protein 1                                                                          |
| 317 | GZMA     | Hs.90708  | 3001  | Granzyme A (granzyme 1, cytotoxic T-lymphocyte-associated serine esterase 3)                   |
| 318 | GZMB     | Hs.1051   | 3002  | Granzyme B (granzyme 2, cytotoxic T-lymphocyte-associated serine esterase 1)                   |
| 319 | GZMH     | Hs.348264 | 2999  | Granzyme H (cathepsin G-like 2, protein h-CCPX)                                                |
| 320 | GZMK     | Hs.277937 | 3003  | Granzyme K (granzyme 3; tryptase II)                                                           |
| 321 | GZMM     | Hs.465511 | 3004  | Granzyme M (lymphocyte met-ase 1)                                                              |
| 322 | HAMP     | Hs.8821   | 57817 | Hepcidin antimicrobial peptide                                                                 |
| 323 | HCLS1    | Hs.14601  | 3059  | Hematopoietic cell-specific Lyn substrate 1                                                    |
| 324 | HDAC4    | Hs.20516  | 9759  | Histone deacetylase 4                                                                          |
| 325 | HDAC5    | Hs.438782 | 10014 | Histone deacetylase 5                                                                          |
| 326 | HDAC7    | Hs.200063 | 51564 | Histone deacetylase 7                                                                          |
| 327 | HDAC9    | Hs.196054 | 9734  | Histone deacetylase 9                                                                          |
| 328 | HELLS    | Hs.655830 | 3070  | Helicase, lymphoid-specific                                                                    |
| 329 | HGF      | Hs.396530 | 3082  | Hepatocyte growth factor (hepapoietin A; scatter factor)                                       |
| 330 | HIF1A    | Hs.597216 | 3091  | Hypoxia-inducible factor 1, alpha subunit (basic helix-loop-helix transcription factor)        |
| 331 | HIF1AN   | Hs.500788 | 55662 | Hypoxia-inducible factor 1, alpha subunit inhibitor                                            |
| 332 | HIF3A    | Hs.420830 | 64344 | Hypoxia inducible factor 3, alpha subunit                                                      |
| 333 | HLA-A    | Hs.181244 | 3105  | Major histocompatibility complex, class I, A                                                   |
| 334 | HLA-B    | Hs.77961  | 3106  | Major histocompatibility complex, class I, B                                                   |
| 335 | HLA-C    | Hs.449621 | 3107  | Major histocompatibility complex, class I, C                                                   |
| 336 | HLA-DPA1 | Hs.347270 | 3113  | Major histocompatibility complex, class II, DP alpha 1                                         |
| 337 | HLA-DQA1 | Hs.387679 | 3117  | Major histocompatibility complex, class II, DQ alpha 1                                         |
| 338 | HLA-DQB1 | Hs.409934 | 3119  | Major histocompatibility complex, class II, DQ beta 1                                          |
| 339 | HLA-DQB2 | Hs.731563 | 3120  | Major histocompatibility complex, class II, DQ beta 2                                          |
| 340 | HLA-DRA  | Hs.520048 | 3122  | Major histocompatibility complex, class II, DR alpha                                           |
| 341 | HLA-E    | Hs.650174 | 3133  | Major histocompatibility complex, class I, E                                                   |
| 342 | HLA-F    | Hs.519972 | 3134  | Major histocompatibility complex, class I, F                                                   |
| 343 | HLA-G    | Hs.512152 | 3135  | HLA-G histocompatibility antigen, class I, G                                                   |
| 344 | HMGB1    | Hs.434102 | 3146  | High-mobility group box 1                                                                      |
| 345 | HMOX1    | Hs.517581 | 3162  | Heme oxygenase (decycling) 1                                                                   |
| 346 | HRH2     | Hs.247885 | 3274  | Histamine receptor H2                                                                          |
| 347 | HSP90AA1 | Hs.523560 | 3320  | Heat shock protein 90kDa alpha (cytosolic), class A member 1                                   |

|     |          |           |       |                                                                                                           |
|-----|----------|-----------|-------|-----------------------------------------------------------------------------------------------------------|
| 348 | HSP90AB1 | Hs.509736 | 3326  | Heat shock protein 90kDa alpha (cytosolic), class B member 1                                              |
| 349 | HSPA1A   | Hs.520028 | 3303  | Heat shock 70kDa protein 1A                                                                               |
| 350 | HSPD1    | Hs.595053 | 3329  | Heat shock 60kDa protein 1 (chaperonin)                                                                   |
| 351 | ICAM1    | Hs.643447 | 3383  | Intercellular adhesion molecule 1 (CD54), human rhinovirus receptor                                       |
| 352 | ICOS     | Hs.56247  | 29851 | Inducible T-cell co-stimulator                                                                            |
| 353 | ICOSLG   | Hs.14155  | 23308 | Inducible T-cell co-stimulator ligand                                                                     |
| 354 | IDO1     | Hs.840    | 3620  | Indoleamine 2,3-dioxygenase 1                                                                             |
| 355 | IFI16    | Hs.380250 | 3428  | Interferon, gamma-inducible protein 16                                                                    |
| 356 | IFI35    | Hs.632258 | 3430  | Interferon-induced protein 35                                                                             |
| 357 | IFI6     | Hs.511731 | 2537  | Interferon, alpha-inducible protein 6                                                                     |
| 358 | IFITM2   | Hs.458414 | 10581 | Interferon induced transmembrane protein 2 (1-8D)                                                         |
| 359 | IFITM3   | Hs.374650 | 10410 | Interferon induced transmembrane protein 3 (1-8U)                                                         |
| 360 | IFNA1    | Hs.37026  | 3439  | Interferon, alpha 1                                                                                       |
| 361 | IFNA10   | Hs.282275 | 3446  | Interferon, alpha 10                                                                                      |
| 362 | IFNA14   | Hs.93907  | 3448  | Interferon, alpha 14                                                                                      |
| 363 | IFNA16   | Hs.56303  | 3449  | Interferon, alpha 16                                                                                      |
| 364 | IFNA17   | Hs.282276 | 3451  | Interferon, alpha 17                                                                                      |
| 365 | IFNA2    | Hs.211575 | 3440  | Interferon, alpha 2                                                                                       |
| 366 | IFNA21   | Hs.113211 | 3452  | Interferon, alpha 21                                                                                      |
| 367 | IFNA4    | Hs.1510   | 3441  | Interferon, alpha 4                                                                                       |
| 368 | IFNA5    | Hs.37113  | 3442  | Interferon, alpha 5                                                                                       |
| 369 | IFNA6    | Hs.533470 | 3443  | Interferon, alpha 6                                                                                       |
| 370 | IFNA7    | Hs.282274 | 3444  | Interferon, alpha 7                                                                                       |
| 371 | IFNA8    | Hs.73890  | 3445  | Interferon, alpha 8                                                                                       |
| 372 | IFNAR1   | Hs.529400 | 3454  | Interferon (alpha, beta and omega) receptor 1                                                             |
| 373 | IFNAR2   | Hs.701988 | 3455  | Interferon (alpha, beta and omega) receptor 2                                                             |
| 374 | IFNB1    | Hs.93177  | 3456  | Interferon, beta 1, fibroblast                                                                            |
| 375 | IFNG     | Hs.856    | 3458  | Interferon, gamma                                                                                         |
| 376 | IFNGR1   | Hs.520414 | 3459  | Interferon gamma receptor 1                                                                               |
| 377 | IFNGR2   | Hs.634632 | 3460  | Interferon gamma receptor 2 (interferon gamma transducer 1)                                               |
| 378 | IFNW1    | Hs.73010  | 3467  | Interferon, omega 1                                                                                       |
| 379 | IGF1R    | Hs.643120 | 3480  | Insulin-like growth factor 1 receptor                                                                     |
| 380 | IGF2R    | Hs.487062 | 3482  | Insulin-like growth factor 2 receptor                                                                     |
| 381 | IGFBP3   | Hs.450230 | 3486  | Insulin-like growth factor binding protein 3                                                              |
| 382 | IGHA1    | Hs.648398 | 3493  | Immunoglobulin heavy constant alpha 1                                                                     |
| 383 | IGHD     | Hs.510635 | 3495  | Immunoglobulin heavy constant delta                                                                       |
| 384 | IGHM     | -         | 3507  | Immunoglobulin heavy constant mu                                                                          |
| 385 | IGJ      | Hs.700610 | 3512  | Immunoglobulin J polypeptide, linker protein for immunoglobulin alpha and mu polypeptides                 |
| 386 | IGKV4-1  | -         | 28908 | Immunoglobulin kappa variable 4-1                                                                         |
| 387 | IGLL1    | Hs.348935 | 3543  | Immunoglobulin lambda-like polypeptide 1                                                                  |
| 388 | IGSF6    | Hs.530902 | 10261 | Immunoglobulin superfamily, member 6                                                                      |
| 389 | IK       | Hs.421245 | 3550  | IK cytokine, down-regulator of HLA II                                                                     |
| 390 | IKBKAP   | Hs.494738 | 8518  | Inhibitor of kappa light polypeptide gene enhancer in B-cells, kinase complex-associated protein          |
| 391 | IKBKE    | Hs.321045 | 9641  | Inhibitor of kappa light polypeptide gene enhancer in B-cells, kinase epsilon                             |
| 392 | IKBKG    | Hs.43505  | 8517  | Inhibitor of kappa light polypeptide gene enhancer in B-cells, kinase gamma                               |
| 393 | IL10     | Hs.193717 | 3586  | Interleukin 10                                                                                            |
| 394 | IL10RA   | Hs.504035 | 3587  | Interleukin 10 receptor, alpha                                                                            |
| 395 | IL10RB   | Hs.654593 | 3588  | Interleukin 10 receptor, beta                                                                             |
| 396 | IL11     | Hs.467304 | 3589  | Interleukin 11                                                                                            |
| 397 | IL11RA   | Hs.591088 | 3590  | Interleukin 11 receptor, alpha                                                                            |
| 398 | IL12A    | Hs.673    | 3592  | Interleukin 12A (natural killer cell stimulatory factor 1, cytotoxic lymphocyte maturation factor 1, p35) |
| 399 | IL12B    | Hs.674    | 3593  | Interleukin 12B (natural killer cell stimulatory factor 2, cytotoxic lymphocyte maturation factor 2, p40) |
| 400 | IL12RB1  | Hs.567294 | 3594  | Interleukin 12 receptor, beta 1                                                                           |
| 401 | IL12RB2  | Hs.479347 | 3595  | Interleukin 12 receptor, beta 2                                                                           |
| 402 | IL13     | Hs.845    | 3596  | Interleukin 13                                                                                            |
| 403 | IL13RA1  | Hs.496646 | 3597  | Interleukin 13 receptor, alpha 1                                                                          |
| 404 | IL13RA2  | Hs.336046 | 3598  | Interleukin 13 receptor, alpha 2                                                                          |
| 405 | IL15     | Hs.654378 | 3600  | Interleukin 15                                                                                            |

|     |          |           |       |                                                                  |
|-----|----------|-----------|-------|------------------------------------------------------------------|
| 406 | IL15RA   | Hs.524117 | 3601  | Interleukin 15 receptor, alpha                                   |
| 407 | IL16     | Hs.459095 | 3603  | Interleukin 16 (lymphocyte chemoattractant factor)               |
| 408 | IL17A    | Hs.41724  | 3605  | Interleukin 17A                                                  |
| 409 | IL17B    | Hs.156979 | 27190 | Interleukin 17B                                                  |
| 410 | IL17RA   | Hs.129751 | 23765 | Interleukin 17 receptor A                                        |
| 411 | IL17RB   | Hs.654970 | 55540 | Interleukin 17 receptor B                                        |
| 412 | IL17RC   | Hs.129959 | 84818 | Interleukin 17 receptor C                                        |
| 413 | IL18     | Hs.83077  | 3606  | Interleukin 18 (interferon-gamma-inducing factor)                |
| 414 | IL18R1   | Hs.469521 | 8809  | Interleukin 18 receptor 1                                        |
| 415 | IL18RAP  | Hs.158315 | 8807  | Interleukin 18 receptor accessory protein                        |
| 416 | IL19     | Hs.661017 | 29949 | Interleukin 19                                                   |
| 417 | IL1A     | Hs.1722   | 3552  | Interleukin 1, alpha                                             |
| 418 | IL1B     | Hs.126256 | 3553  | Interleukin 1, beta                                              |
| 419 | IL1F6    | Hs.278910 | 27179 | Interleukin 1 family, member 6 (epsilon)                         |
| 420 | IL1F7    | Hs.166371 | 27178 | Interleukin 1 family, member 7 (zeta)                            |
| 421 | IL1R1    | Hs.701982 | 3554  | Interleukin 1 receptor, type I                                   |
| 422 | IL1R2    | Hs.25333  | 7850  | Interleukin 1 receptor, type II                                  |
| 423 | IL1RAP   | Hs.478673 | 3556  | Interleukin 1 receptor accessory protein                         |
| 424 | IL1RAPL1 | Hs.658912 | 11141 | Interleukin 1 receptor accessory protein-like 1                  |
| 425 | IL1RAPL2 | Hs.675519 | 26280 | Interleukin 1 receptor accessory protein-like 2                  |
| 426 | IL1RL1   | Hs.66     | 9173  | Interleukin 1 receptor-like 1                                    |
| 427 | IL1RL2   | Hs.659863 | 8808  | Interleukin 1 receptor-like 2                                    |
| 428 | IL1RN    | Hs.81134  | 3557  | Interleukin 1 receptor antagonist                                |
| 429 | IL2      | Hs.89679  | 3558  | Interleukin 2                                                    |
| 430 | IL20RA   | Hs.445868 | 53832 | Interleukin 20 receptor, alpha                                   |
| 431 | IL21     | Hs.567559 | 59067 | Interleukin 21                                                   |
| 432 | IL21R    | Hs.210546 | 50615 | Interleukin 21 receptor                                          |
| 433 | IL22     | Hs.287369 | 50616 | Interleukin 22                                                   |
| 434 | IL22RA1  | Hs.110915 | 58985 | Interleukin 22 receptor, alpha 1                                 |
| 435 | IL23A    | Hs.98309  | 51561 | Interleukin 23, alpha subunit p19                                |
| 436 | IL24     | Hs.58831  | 11009 | Interleukin 24                                                   |
| 437 | IL25     | Hs.302036 | 64806 | Interleukin 25                                                   |
| 438 | IL26     | Hs.272350 | 55801 | Interleukin 26                                                   |
| 439 | IL27RA   | Hs.132781 | 9466  | Interleukin 27 receptor, alpha                                   |
| 440 | IL2RA    | Hs.231367 | 3559  | Interleukin 2 receptor, alpha                                    |
| 441 | IL2RB    | Hs.474787 | 3560  | Interleukin 2 receptor, beta                                     |
| 442 | IL2RG    | Hs.84     | 3561  | Interleukin 2 receptor, gamma (severe combined immunodeficiency) |
| 443 | IL3      | Hs.694    | 3562  | Interleukin 3 (colony-stimulating factor, multiple)              |
| 444 | IL32     | Hs.943    | 9235  | Interleukin 32                                                   |
| 445 | IL33     | Hs.348390 | 90865 | Interleukin 33                                                   |
| 446 | IL3RA    | Hs.632790 | 3563  | Interleukin 3 receptor, alpha (low affinity)                     |
| 447 | IL4      | Hs.73917  | 3565  | Interleukin 4                                                    |
| 448 | IL4R     | Hs.513457 | 3566  | Interleukin 4 receptor                                           |
| 449 | IL5      | Hs.2247   | 3567  | Interleukin 5 (colony-stimulating factor, eosinophil)            |
| 450 | IL5RA    | Hs.68876  | 3568  | Interleukin 5 receptor, alpha                                    |
| 451 | IL6      | Hs.654458 | 3569  | Interleukin 6 (interferon, beta 2)                               |
| 452 | IL6R     | Hs.695954 | 3570  | Interleukin 6 receptor                                           |
| 453 | IL6ST    | Hs.532082 | 3572  | Interleukin 6 signal transducer (gp130, oncostatin M receptor)   |
| 454 | IL7      | Hs.591873 | 3574  | Interleukin 7                                                    |
| 455 | IL7R     | Hs.591742 | 3575  | Interleukin 7 receptor                                           |
| 456 | IL8      | Hs.624    | 3576  | Interleukin 8                                                    |
| 457 | IL9      | Hs.960    | 3578  | Interleukin 9                                                    |
| 458 | INHHA    | Hs.407506 | 3623  | Inhibin, alpha                                                   |
| 459 | INHBA    | Hs.583348 | 3624  | Inhibin, beta A                                                  |
| 460 | INS      | Hs.654579 | 3630  | Insulin                                                          |
| 461 | IRF1     | Hs.436061 | 3659  | Interferon regulatory factor 1                                   |
| 462 | IRF4     | Hs.401013 | 3662  | Interferon regulatory factor 4                                   |
| 463 | IRF8     | Hs.137427 | 3394  | Interferon regulatory factor 8                                   |



|     |          |           |        |                                                                                                       |
|-----|----------|-----------|--------|-------------------------------------------------------------------------------------------------------|
| 464 | ITGA4    | Hs.694732 | 3676   | Integrin, alpha 4 (antigen CD49D, alpha 4 subunit of VLA-4 receptor)                                  |
| 465 | ITGAE    | Hs.513867 | 3682   | Integrin, alpha E (antigen CD103, human mucosal lymphocyte antigen 1; alpha polypeptide)              |
| 466 | ITGAL    | Hs.174103 | 3683   | Integrin, alpha L (antigen CD11A (p180), lymphocyte function-associated antigen 1; alpha polypeptide) |
| 467 | ITGAM    | Hs.172631 | 3684   | Integrin, alpha M (complement component 3 receptor 3 subunit)                                         |
| 468 | ITGAX    | Hs.248472 | 3687   | Integrin, alpha X (complement component 3 receptor 4 subunit)                                         |
| 469 | ITGB1    | Hs.695946 | 3688   | Integrin, beta 1 (fibronectin receptor, beta polypeptide, antigen CD29 includes MDF2, MSK12)          |
| 470 | ITGB2    | Hs.375957 | 3689   | Integrin, beta 2 (complement component 3 receptor 3 and 4 subunit)                                    |
| 471 | ITGB7    | Hs.654470 | 3695   | Integrin, beta 7                                                                                      |
| 472 | ITIH1    | Hs.420257 | 3697   | Inter-alpha (globulin) inhibitor H1                                                                   |
| 473 | JAG1     | Hs.224012 | 182    | Jagged 1 (Alagille syndrome)                                                                          |
| 474 | JAG2     | Hs.433445 | 3714   | Jagged 2                                                                                              |
| 475 | KDR      | Hs.479756 | 3791   | Kinase insert domain receptor (a type III receptor tyrosine kinase)                                   |
| 476 | KIF13B   | Hs.444767 | 23303  | Kinesin family member 13B                                                                             |
| 477 | KIR2DL1  | Hs.654605 | 3802   | Killer cell immunoglobulin-like receptor, two domains, long cytoplasmic tail, 1                       |
| 478 | KIR2DL2  | -         | 3803   | Killer cell immunoglobulin-like receptor, two domains, long cytoplasmic tail, 2                       |
| 479 | KIR2DL3  | Hs.731378 | 3804   | Killer cell immunoglobulin-like receptor, two domains, long cytoplasmic tail, 3                       |
| 480 | KIR2DL4  | Hs.651287 | 3805   | Killer cell immunoglobulin-like receptor, two domains, long cytoplasmic tail, 4                       |
| 481 | KIR2DL5A | Hs.676464 | 57292  | Killer cell immunoglobulin-like receptor, two domains, long cytoplasmic tail, 5A                      |
| 482 | KIR2DS1  | Hs.720721 | 3806   | Killer cell immunoglobulin-like receptor, two domains, short cytoplasmic tail, 1                      |
| 483 | KIR2DS3  | -         | 3808   | Killer cell immunoglobulin-like receptor, two domains, short cytoplasmic tail, 3                      |
| 484 | KIR2DS4  | Hs.654608 | 3809   | Killer cell immunoglobulin-like receptor, two domains, short cytoplasmic tail, 4                      |
| 485 | KIR3DL1  | Hs.645228 | 3811   | Killer cell immunoglobulin-like receptor, three domains, long cytoplasmic tail, 1                     |
| 486 | KIR3DL3  | Hs.645224 | 115653 | Killer cell immunoglobulin-like receptor, three domains, long cytoplasmic tail, 3                     |
| 487 | KIR3DS1  | Hs.659860 | 3813   | Killer cell immunoglobulin-like receptor, three domains, short cytoplasmic tail, 1                    |
| 488 | KIT      | Hs.479754 | 3815   | V-kit Hardy-Zuckerman 4 feline sarcoma viral oncogene homolog                                         |
| 489 | KITLG    | Hs.1048   | 4254   | KIT ligand                                                                                            |
| 490 | KLF6     | Hs.4055   | 1316   | Kruppel-like factor 6                                                                                 |
| 491 | KLRB1    | Hs.169824 | 3820   | Killer cell lectin-like receptor subfamily B, member 1                                                |
| 492 | KLRC3    | Hs.654362 | 3823   | Killer cell lectin-like receptor subfamily C, member 3                                                |
| 493 | KLRC4    | Hs.665704 | 8302   | Killer cell lectin-like receptor subfamily C, member 4                                                |
| 494 | KLRD1    | Hs.562457 | 3824   | Killer cell lectin-like receptor subfamily D, member 1                                                |
| 495 | KLRF1    | Hs.183125 | 51348  | Killer cell lectin-like receptor subfamily F, member 1                                                |
| 496 | KLRG1    | Hs.558446 | 10219  | Killer cell lectin-like receptor subfamily G, member 1                                                |
| 497 | KLRK1    | Hs.387787 | 22914  | Killer cell lectin-like receptor subfamily K, member 1                                                |
| 498 | KRT1     | Hs.80828  | 3848   | Keratin 1 (epidermolytic hyperkeratosis)                                                              |
| 499 | KYNU     | Hs.470126 | 8942   | Kynureninase (L-kynurenine hydrolase)                                                                 |
| 500 | LAG3     | Hs.409523 | 3902   | Lymphocyte-activation gene 3                                                                          |
| 501 | LAIR1    | Hs.572535 | 3903   | Leukocyte-associated immunoglobulin-like receptor 1                                                   |
| 502 | LAIR2    | Hs.43803  | 3904   | Leukocyte-associated immunoglobulin-like receptor 2                                                   |
| 503 | LAMP3    | Hs.518448 | 27074  | Lysosomal-associated membrane protein 3                                                               |
| 504 | LAT2     | Hs.647049 | 7462   | Linker for activation of T cells family, member 2                                                     |
| 505 | LAX1     | Hs.272794 | 54900  | Lymphocyte transmembrane adaptor 1                                                                    |
| 506 | LBP      | Hs.154078 | 3929   | Lipopolysaccharide binding protein                                                                    |
| 507 | LCK      | Hs.470627 | 3932   | Lymphocyte-specific protein tyrosine kinase                                                           |
| 508 | LCP2     | Hs.304475 | 3937   | Lymphocyte cytosolic protein 2 (SH2 domain containing leukocyte protein of 76kDa)                     |
| 509 | LDB1     | Hs.702266 | 8861   | LIM domain binding 1                                                                                  |
| 510 | LIF      | Hs.2250   | 3976   | Leukemia inhibitory factor (cholinergic differentiation factor)                                       |
| 511 | LIFR     | Hs.133421 | 3977   | Leukemia inhibitory factor receptor alpha                                                             |
| 512 | LIG1     | Hs.1770   | 3978   | Ligase I, DNA, ATP-dependent                                                                          |
| 513 | LIG3     | Hs.100299 | 3980   | Ligase III, DNA, ATP-dependent                                                                        |
| 514 | LIG4     | Hs.166091 | 3981   | Ligase IV, DNA, ATP-dependent                                                                         |
| 515 | LILRA1   | Hs.710507 | 11024  | Leukocyte immunoglobulin-like receptor, subfamily A (without TM domain), member 1                     |
| 516 | LILRA2   | Hs.655593 | 11027  | Leukocyte immunoglobulin-like receptor, subfamily A (without TM domain), member 2                     |
| 517 | LILRA3   | Hs.113277 | 11026  | Leukocyte immunoglobulin-like receptor, subfamily A (without TM domain), member 3                     |
| 518 | LILRA4   | Hs.406708 | 23547  | Leukocyte immunoglobulin-like receptor, subfamily A (without TM domain), member 4                     |
| 519 | LILRA5   | Hs.710986 | 353514 | Leukocyte immunoglobulin-like receptor, subfamily A (without TM domain), member 5                     |
| 520 | LILRA6   | Hs.688335 | 79168  | Leukocyte immunoglobulin-like receptor, subfamily A (without TM domain), member 6                     |
| 521 | LILRB1   | Hs.655593 | 10859  | Leukocyte immunoglobulin-like receptor, subfamily B (with TM and ITIM domains), member 1              |

|     |           |           |        |                                                                                                      |
|-----|-----------|-----------|--------|------------------------------------------------------------------------------------------------------|
| 522 | LILRB2    | Hs.655652 | 10288  | Leukocyte immunoglobulin-like receptor, subfamily B (with TM and ITIM domains), member 2             |
| 523 | LILRB3    | Hs.631592 | 11025  | Leukocyte immunoglobulin-like receptor, subfamily B (with TM and ITIM domains), member 3             |
| 524 | LILRB4    | Hs.67846  | 11006  | Leukocyte immunoglobulin-like receptor, subfamily B (with TM and ITIM domains), member 4             |
| 525 | LILRB5    | Hs.655338 | 10990  | Leukocyte immunoglobulin-like receptor, subfamily B (with TM and ITIM domains), member 5             |
| 526 | LOC254896 | Hs.735240 | 254896 | Uncharacterized LOC254896                                                                            |
| 527 | LOC91316  | Hs.148656 | 91316  | Similar to bK246H3.1 (immunoglobulin lambda-like polypeptide 1, pre-B-cell specific)                 |
| 528 | LTA       | Hs.36     | 4049   | Lymphotoxin alpha (TNF superfamily, member 1)                                                        |
| 529 | LTB       | Hs.376208 | 4050   | Lymphotoxin beta (TNF superfamily, member 3)                                                         |
| 530 | LTB4R     | Hs.655431 | 1241   | Leukotriene B4 receptor                                                                              |
| 531 | LTB4R2    | Hs.642693 | 56413  | Leukotriene B4 receptor 2                                                                            |
| 532 | LTBR      | Hs.1116   | 4055   | Lymphotoxin beta receptor (TNFR superfamily, member 3)                                               |
| 533 | LTF       | Hs.529517 | 4057   | Lactotransferrin                                                                                     |
| 534 | LY75      | Hs.153563 | 4065   | Lymphocyte antigen 75                                                                                |
| 535 | LY86      | Hs.653138 | 9450   | Lymphocyte antigen 86                                                                                |
| 536 | LY9       | Hs.403857 | 4063   | Lymphocyte antigen 9                                                                                 |
| 537 | LYN       | Hs.699154 | 4067   | V-yes-1 Yamaguchi sarcoma viral related oncogene homolog                                             |
| 538 | LYST      | Hs.532411 | 1130   | Lysosomal trafficking regulator                                                                      |
| 539 | MADCAM1   | Hs.102598 | 8174   | Mucosal vascular addressin cell adhesion molecule 1                                                  |
| 540 | MAFB      | Hs.702085 | 9935   | V-maf musculoaponeurotic fibrosarcoma oncogene homolog B (avian)                                     |
| 541 | MAG       | Hs.348346 | 27307  | Malignancy-associated gene                                                                           |
| 542 | MALT1     | Hs.601217 | 10892  | Mucosa associated lymphoid tissue lymphoma translocation gene 1                                      |
| 543 | MAP3K7    | Hs.644143 | 6885   | Mitogen-activated protein kinase kinase kinase 7                                                     |
| 544 | MAP4K2    | Hs.534341 | 5871   | Mitogen-activated protein kinase kinase kinase 2                                                     |
| 545 | MASP1     | Hs.89983  | 5648   | Mannan-binding lectin serine peptidase 1 (C4/C2 activating component of Ra-reactive factor)          |
| 546 | MASP2     | Hs.655645 | 10747  | Mannan-binding lectin serine peptidase 2                                                             |
| 547 | MBL2      | Hs.499674 | 4153   | Mannose-binding lectin (protein C) 2, soluble (opsonic defect)                                       |
| 548 | MBP       | Hs.551713 | 4155   | Myelin basic protein                                                                                 |
| 549 | MEIS3P1   | Hs.356135 | 4213   | Meis homeobox 3 pseudogene 1                                                                         |
| 550 | MET       | Hs.132966 | 4233   | Met proto-oncogene (hepatocyte growth factor receptor)                                               |
| 551 | MIA3      | Hs.118474 | 375056 | Melanoma inhibitory activity family, member 3                                                        |
| 552 | MICA      | Hs.549053 | 4276   | MHC class I polypeptide-related sequence A                                                           |
| 553 | MICB      | Hs.211580 | 4277   | MHC class I polypeptide-related sequence B                                                           |
| 554 | MIF       | Hs.407995 | 4282   | Macrophage migration inhibitory factor (glycosylation-inhibiting factor)                             |
| 555 | MLF1      | Hs.85195  | 4291   | Myeloid leukemia factor 1                                                                            |
| 556 | MLL       | Hs.258855 | 4297   | Myeloid/lymphoid or mixed-lineage leukemia (trithorax homolog, Drosophila)                           |
| 557 | MMP7      | Hs.2256   | 4316   | Matrix metalloproteinase 7 (matrilysin, uterine)                                                     |
| 558 | MMP9      | Hs.297413 | 4318   | Matrix metalloproteinase 9 (gelatinase B, 92kDa gelatinase, 92kDa type IV collagenase)               |
| 559 | MNX1      | Hs.37035  | 3110   | Motor neuron and pancreas homeobox 1                                                                 |
| 560 | MR1       | Hs.101840 | 3140   | Major histocompatibility complex, class I-related                                                    |
| 561 | MS4A1     | Hs.438040 | 931    | Membrane-spanning 4-domains, subfamily A, member 1                                                   |
| 562 | MS4A2     | Hs.386748 | 2206   | Membrane-spanning 4-domains, subfamily A, member 2 (Fc fragment of IgE, high affinity I, receptor 1) |
| 563 | MSH2      | Hs.597656 | 4436   | MutS homolog 2, colon cancer, nonpolyposis type 1 (E. coli)                                          |
| 564 | MSN       | Hs.87752  | 4478   | Moesin                                                                                               |
| 565 | MSR1      | Hs.147635 | 4481   | Macrophage scavenger receptor 1                                                                      |
| 566 | MYD88     | Hs.82116  | 4615   | Myeloid differentiation primary response gene (88)                                                   |
| 567 | MYH9      | Hs.474751 | 4627   | Myosin, heavy chain 9, non-muscle                                                                    |
| 568 | MYST1     | Hs.533803 | 84148  | MYST histone acetyltransferase 1                                                                     |
| 569 | MYST3     | Hs.491577 | 7994   | MYST histone acetyltransferase (monocytic leukemia) 3                                                |
| 570 | NCAM1     | Hs.503878 | 4684   | Neural cell adhesion molecule 1                                                                      |
| 571 | NCF1C     | Hs.648940 | 654817 | Neutrophil cytosolic factor 1C pseudogene                                                            |
| 572 | NCF2      | Hs.587558 | 4688   | Neutrophil cytosolic factor 2 (65kDa, chronic granulomatous disease, autosomal 2)                    |
| 573 | NCF4      | Hs.474781 | 4689   | Neutrophil cytosolic factor 4, 40kDa                                                                 |
| 574 | NCK1      | Hs.477693 | 4690   | NCK adaptor protein 1                                                                                |
| 575 | NCK2      | Hs.695241 | 8440   | NCK adaptor protein 2                                                                                |
| 576 | NCOA6     | Hs.368971 | 23054  | Nuclear receptor coactivator 6                                                                       |
| 577 | NCR1      | Hs.97084  | 9437   | Natural cytotoxicity triggering receptor 1                                                           |
| 578 | NCR2      | Hs.194721 | 9436   | Natural cytotoxicity triggering receptor 2                                                           |
| 579 | NCR3      | Hs.509513 | 259197 | Natural cytotoxicity triggering receptor 3                                                           |

|     |          |           |        |                                                                                                 |
|-----|----------|-----------|--------|-------------------------------------------------------------------------------------------------|
| 580 | NFIL3    | Hs.79334  | 4783   | Nuclear factor, interleukin 3 regulated                                                         |
| 581 | NGF      | Hs.2561   | 4803   | Nerve growth factor (beta polypeptide)                                                          |
| 582 | NGFR     | Hs.415768 | 4804   | Nerve growth factor receptor (TNFR superfamily, member 16)                                      |
| 583 | NHEJ1    | Hs.225988 | 79840  | Nonhomologous end-joining factor 1                                                              |
| 584 | NKX2-5   | Hs.54473  | 1482   | NK2 transcription factor related, locus 5 (Drosophila)                                          |
| 585 | NOD2     | Hs.592072 | 64127  | Nucleotide-binding oligomerization domain containing 2                                          |
| 586 | NOS1     | Hs.654410 | 4842   | Nitric oxide synthase 1 (neuronal)                                                              |
| 587 | NOS2     | Hs.709191 | 4843   | Nitric oxide synthase 2, inducible                                                              |
| 588 | NOS3     | Hs.699165 | 4846   | Nitric oxide synthase 3 (endothelial cell)                                                      |
| 589 | NOTCH1   | Hs.495473 | 4851   | Notch homolog 1, translocation-associated (Drosophila)                                          |
| 590 | NOTCH2   | Hs.487360 | 4853   | Notch homolog 2 (Drosophila)                                                                    |
| 591 | NOTCH4   | Hs.436100 | 4855   | Notch homolog 4 (Drosophila)                                                                    |
| 592 | NPM1     | Hs.557550 | 4869   | Nucleophosmin (nucleolar phosphoprotein B23, numatrin)                                          |
| 593 | NPTN     | Hs.187866 | 27020  | Neuroplastin                                                                                    |
| 594 | ODZ1     | Hs.23796  | 10178  | Odz, odd Oz/ten-m homolog 1(Drosophila)                                                         |
| 595 | OPRD1    | Hs.372    | 4985   | Opioid receptor, delta 1                                                                        |
| 596 | OPRK1    | Hs.106795 | 4986   | Opioid receptor, kappa 1                                                                        |
| 597 | PAX5     | Hs.654464 | 5079   | Paired box 5                                                                                    |
| 598 | PDCD1    | Hs.158297 | 5133   | Programmed cell death 1                                                                         |
| 599 | PDCD1LG2 | Hs.532279 | 80380  | Programmed cell death 1 ligand 2                                                                |
| 600 | PDGFA    | Hs.705381 | 5154   | Platelet-derived growth factor alpha polypeptide                                                |
| 601 | PDGFB    | Hs.1976   | 5155   | Platelet-derived growth factor beta polypeptide (simian sarcoma viral (v-sis) oncogene homolog) |
| 602 | PDGFC    | Hs.570855 | 56034  | Platelet derived growth factor C                                                                |
| 603 | PDGFD    | Hs.352298 | 80310  | Platelet derived growth factor D                                                                |
| 604 | PDGFRA   | Hs.74615  | 5156   | Platelet-derived growth factor receptor, alpha polypeptide                                      |
| 605 | PDGFRB   | Hs.509067 | 5159   | Platelet-derived growth factor receptor, beta polypeptide                                       |
| 606 | PF4      | Hs.81564  | 5196   | Platelet factor 4 (chemokine (C-X-C motif) ligand 4)                                            |
| 607 | PF4V1    | Hs.72933  | 5197   | Platelet factor 4 variant 1                                                                     |
| 608 | PGF      | Hs.252820 | 5228   | Placental growth factor, vascular endothelial growth factor-related protein                     |
| 609 | PGLYRP1  | Hs.137583 | 8993   | Peptidoglycan recognition protein 1                                                             |
| 610 | PGLYRP4  | Hs.58356  | 57115  | Peptidoglycan recognition protein 4                                                             |
| 611 | PGRMC1   | Hs.90061  | 10857  | Progesterone receptor membrane component 1                                                      |
| 612 | PLA2G1B  | Hs.992    | 5319   | Phospholipase A2, group IB (pancreas)                                                           |
| 613 | PLUNC    | Hs.211092 | 51297  | Palate, lung and nasal epithelium carcinoma associated                                          |
| 614 | PMF1     | Hs.530479 | 11243  | Polyamine-modulated factor 1                                                                    |
| 615 | PML      | Hs.526464 | 5371   | Promyelocytic leukemia                                                                          |
| 616 | PNP      | Hs.75514  | 4860   | Purine nucleoside phosphorylase                                                                 |
| 617 | POLL     | Hs.523230 | 27343  | Polymerase (DNA directed), lambda                                                               |
| 618 | POU2AF1  | Hs.654525 | 5450   | POU class 2 associating factor 1                                                                |
| 619 | POU2F2   | Hs.654420 | 5452   | POU class 2 homeobox 2                                                                          |
| 620 | PPARG    | Hs.162646 | 5468   | Peroxisome proliferator-activated receptor gamma                                                |
| 621 | PPBP     | Hs.2164   | 5473   | Pro-platelet basic protein (chemokine (C-X-C motif) ligand 7)                                   |
| 622 | PRDX3    | Hs.523302 | 10935  | Peroxiredoxin 3                                                                                 |
| 623 | PRF1     | Hs.2200   | 5551   | Perforin 1 (pore forming protein)                                                               |
| 624 | PRG3     | Hs.251386 | 10394  | Proteoglycan 3                                                                                  |
| 625 | PRKRA    | Hs.632540 | 8575   | Protein kinase, interferon-inducible double stranded RNA dependent activator                    |
| 626 | PRLR     | Hs.368587 | 5618   | Prolactin receptor                                                                              |
| 627 | PROS1    | Hs.64016  | 5627   | Protein S (alpha)                                                                               |
| 628 | PSMB10   | Hs.9661   | 5699   | Proteasome (prosome, macropain) subunit, beta type, 10                                          |
| 629 | PTAFR    | Hs.77542  | 5724   | Platelet-activating factor receptor                                                             |
| 630 | PTCRA    | Hs.169002 | 171558 | Pre T-cell antigen receptor alpha                                                               |
| 631 | PTGER4   | Hs.199248 | 5734   | Prostaglandin E receptor 4 (subtype EP4)                                                        |
| 632 | PTGS2    | Hs.196384 | 5743   | Prostaglandin-endoperoxide synthase 2 (prostaglandin G/H synthase and cyclooxygenase)           |
| 633 | PTPRC    | Hs.654514 | 5788   | Protein tyrosine phosphatase, receptor type, C                                                  |
| 634 | PVR      | Hs.171844 | 5817   | Poliovirus receptor                                                                             |
| 635 | PVRL1    | Hs.334846 | 5818   | Poliovirus receptor-related 1 (herpesvirus entry mediator C)                                    |
| 636 | PVRL2    | Hs.655455 | 5819   | Poliovirus receptor-related 2 (herpesvirus entry mediator B)                                    |
| 637 | PXDN     | Hs.332197 | 7837   | Peroxidasin homolog (Drosophila)                                                                |

|     |          |           |       |                                                                                                      |
|-----|----------|-----------|-------|------------------------------------------------------------------------------------------------------|
| 638 | RAG1     | Hs.73958  | 5896  | Recombination activating gene 1                                                                      |
| 639 | RAG2     | Hs.159376 | 5897  | Recombination activating gene 2                                                                      |
| 640 | RARA     | Hs.654583 | 5914  | Retinoic acid receptor, alpha                                                                        |
| 641 | RBP4     | Hs.50223  | 5950  | Retinol binding protein 4, plasma                                                                    |
| 642 | RELA     | Hs.502875 | 5970  | V-rel reticuloendotheliosis viral oncogene homolog A, nuclear factor of kappa light polypeptide gene |
| 643 | RFX1     | Hs.655215 | 5989  | Regulatory factor X, 1 (influences HLA class II expression)                                          |
| 644 | RGS1     | Hs.75256  | 5996  | Regulator of G-protein signaling 1                                                                   |
| 645 | RHOH     | Hs.654594 | 399   | Ras homolog gene family, member H                                                                    |
| 646 | ROCK1    | Hs.306307 | 6093  | Rho-associated, coiled-coil containing protein kinase 1                                              |
| 647 | RPS14    | Hs.381126 | 6208  | Ribosomal protein S14                                                                                |
| 648 | RPS19    | Hs.438429 | 6223  | Ribosomal protein S19                                                                                |
| 649 | RSAD2    | Hs.17518  | 91543 | Radical S-adenosyl methionine domain containing 2                                                    |
| 650 | RTKL1    | Hs.730810 | 51750 | Regulator of telomere elongation helicase 1                                                          |
| 651 | RUNX1    | Hs.149261 | 861   | Runt-related transcription factor 1 (acute myeloid leukemia 1; aml1 oncogene)                        |
| 652 | S100A7   | Hs.112408 | 6278  | S100 calcium binding protein A7                                                                      |
| 653 | S100A8   | Hs.416073 | 6279  | S100 calcium binding protein A8                                                                      |
| 654 | S100A9   | Hs.112405 | 6280  | S100 calcium binding protein A9                                                                      |
| 655 | S1PR4    | Hs.662006 | 8698  | Sphingosine-1-phosphate receptor 4                                                                   |
| 656 | SAMHD1   | Hs.580681 | 25939 | SAM domain and HD domain 1                                                                           |
| 657 | SART1    | Hs.502883 | 9092  | Squamous cell carcinoma antigen recognized by T cells                                                |
| 658 | SBNO2    | Hs.408708 | 22904 | Strawberry notch homolog 2 (Drosophila)                                                              |
| 659 | SCARB2   | Hs.349656 | 950   | Scavenger receptor class B, member 2                                                                 |
| 660 | SCG2     | Hs.516726 | 7857  | Secretogranin II (chromogranin C)                                                                    |
| 661 | SCIN     | Hs.655515 | 85477 | Scinderin                                                                                            |
| 662 | SDF2     | Hs.514036 | 6388  | Stromal cell-derived factor 2                                                                        |
| 663 | SDF4     | Hs.42806  | 51150 | Stromal cell derived factor 4                                                                        |
| 664 | SECTM1   | Hs.558009 | 6398  | Secreted and transmembrane 1                                                                         |
| 665 | SEMA3C   | Hs.269109 | 10512 | Sema domain, immunoglobulin domain (Ig), short basic domain, secreted, (semaphorin) 3C               |
| 666 | SEMA4D   | Hs.655281 | 10507 | Sema domain, immunoglobulin domain (Ig), transmembrane domain (TM) and short cytoplasmic dom         |
| 667 | SEMA7A   | Hs.24640  | 8482  | Semaphorin 7A, GPI membrane anchor (John Milton Hagen blood group)                                   |
| 668 | SERPINB3 | Hs.227948 | 6317  | Serpin peptidase inhibitor, clade B (ovalbumin), member 3                                            |
| 669 | SERPINB4 | Hs.123035 | 6318  | Serpin peptidase inhibitor, clade B (ovalbumin), member 4                                            |
| 670 | SFTPD    | Hs.253495 | 6441  | Surfactant, pulmonary-associated protein D                                                           |
| 671 | SIGLEC1  | Hs.31869  | 6614  | Sialic acid binding Ig-like lectin 1, sialoadhesin                                                   |
| 672 | SIGLEC5  | Hs.310333 | 8778  | Sialic acid binding Ig-like lectin 5                                                                 |
| 673 | SIGLEC6  | Hs.397255 | 946   | Sialic acid binding Ig-like lectin 6                                                                 |
| 674 | SIGLEC7  | Hs.699304 | 27036 | Sialic acid binding Ig-like lectin 7                                                                 |
| 675 | SIGLEC8  | Hs.447899 | 27181 | Sialic acid binding Ig-like lectin 8                                                                 |
| 676 | SIGLEC9  | Hs.245828 | 27180 | Sialic acid binding Ig-like lectin 9                                                                 |
| 677 | SIRPG    | Hs.590883 | 55423 | Signal-regulatory protein gamma                                                                      |
| 678 | SIT1     | Hs.88012  | 27240 | Signaling threshold regulating transmembrane adaptor 1                                               |
| 679 | SIVA1    | Hs.112058 | 10572 | SIVA1, apoptosis-inducing factor                                                                     |
| 680 | SKAP1    | Hs.316931 | 8631  | Src kinase associated phosphoprotein 1                                                               |
| 681 | SLAMF7   | Hs.517265 | 57823 | SLAM family member 7                                                                                 |
| 682 | SLC11A1  | Hs.591607 | 6556  | Solute carrier family 11 (proton-coupled divalent metal ion transporters), member 1                  |
| 683 | SMAD3    | Hs.618504 | 4088  | SMAD family member 3                                                                                 |
| 684 | SMAD6    | Hs.153863 | 4091  | SMAD family member 6                                                                                 |
| 685 | SNRK     | Hs.476052 | 54861 | SNF related kinase                                                                                   |
| 686 | SOCS5    | Hs.468426 | 9655  | Suppressor of cytokine signaling 5                                                                   |
| 687 | SOD1     | Hs.443914 | 6647  | Superoxide dismutase 1, soluble (amyotrophic lateral sclerosis 1 (adult))                            |
| 688 | SOX4     | Hs.699195 | 6659  | SRY (sex determining region Y)-box 4                                                                 |
| 689 | SP100    | Hs.369056 | 6672  | SP100 nuclear antigen                                                                                |
| 690 | SP2      | Hs.514276 | 6668  | Sp2 transcription factor                                                                             |
| 691 | SPG21    | Hs.242458 | 51324 | Spastic paraplegia 21 (autosomal recessive, Mast syndrome)                                           |
| 692 | SPI1     | Hs.502511 | 6688  | Spleen focus forming virus (SFFV) proviral integration oncogene spi1                                 |
| 693 | SPINK5   | Hs.331555 | 11005 | Serine peptidase inhibitor, Kazal type 5                                                             |
| 694 | ST6GAL1  | Hs.207459 | 6480  | ST6 beta-galactosamide alpha-2,6-sialyltransferase 1                                                 |
| 695 | SYK      | Hs.371720 | 6850  | Spleen tyrosine kinase                                                                               |

|     |           |           |       |                                                                                                          |
|-----|-----------|-----------|-------|----------------------------------------------------------------------------------------------------------|
| 696 | TAP1      | Hs.352018 | 6890  | Transporter 1, ATP-binding cassette, sub-family B (MDR/TAP)                                              |
| 697 | TAP2      | Hs.502    | 6891  | Transporter 2, ATP-binding cassette, sub-family B (MDR/TAP)                                              |
| 698 | TAPBP     | Hs.370937 | 6892  | TAP binding protein (tapasin)                                                                            |
| 699 | TARBP2    | Hs.326    | 6895  | TAR (HIV-1) RNA binding protein 2                                                                        |
| 700 | TAZ       | Hs.409911 | 6901  | Tafazzin (cardiomyopathy, dilated 3A (X-linked); endocardial fibroelastosis 2; Barth syndrome)           |
| 701 | TBX1      | Hs.173984 | 6899  | T-box 1                                                                                                  |
| 702 | TBX21     | Hs.272409 | 30009 | T-box 21                                                                                                 |
| 703 | TCF12     | Hs.511504 | 6938  | Transcription factor 12 (HTF4, helix-loop-helix transcription factors 4)                                 |
| 704 | TCF3      | Hs.371282 | 6929  | Transcription factor 3 (E2A immunoglobulin enhancer binding factors E12/E47)                             |
| 705 | TCF7      | Hs.573153 | 6932  | Transcription factor 7 (T-cell specific, HMG-box)                                                        |
| 706 | TGFA      | Hs.170009 | 7039  | Transforming growth factor, alpha                                                                        |
| 707 | TGFB1     | Hs.645227 | 7040  | Transforming growth factor, beta 1                                                                       |
| 708 | TGFB2     | Hs.133379 | 7042  | Transforming growth factor, beta 2                                                                       |
| 709 | TGFB3     | Hs.592317 | 7043  | Transforming growth factor, beta 3                                                                       |
| 710 | TGFBR1    | Hs.494622 | 7046  | Transforming growth factor, beta receptor I (activin A receptor type II-like kinase, 53kDa)              |
| 711 | TGFBR2    | Hs.82028  | 7048  | Transforming growth factor, beta receptor II (70/80kDa)                                                  |
| 712 | TGFBR3    | Hs.482390 | 7049  | Transforming growth factor, beta receptor III                                                            |
| 713 | THBS1     | Hs.164226 | 7057  | Thrombospondin 1                                                                                         |
| 714 | THY1      | Hs.653181 | 7070  | Thy-1 cell surface antigen                                                                               |
| 715 | TLR1      | Hs.621817 | 7096  | Toll-like receptor 1                                                                                     |
| 716 | TLR2      | Hs.519033 | 7097  | Toll-like receptor 2                                                                                     |
| 717 | TLR3      | Hs.657724 | 7098  | Toll-like receptor 3                                                                                     |
| 718 | TLR4      | Hs.174312 | 7099  | Toll-like receptor 4                                                                                     |
| 719 | TLR5      | Hs.604542 | 7100  | Toll-like receptor 5                                                                                     |
| 720 | TLR6      | Hs.662185 | 10333 | Toll-like receptor 6                                                                                     |
| 721 | TLR7      | Hs.659215 | 51284 | Toll-like receptor 7                                                                                     |
| 722 | TLR8      | Hs.660543 | 51311 | Toll-like receptor 8                                                                                     |
| 723 | TM7SF4    | Hs.652230 | 81501 | Transmembrane 7 superfamily member 4                                                                     |
| 724 | TMX1      | Hs.125221 | 81542 | Thioredoxin-related transmembrane protein 1                                                              |
| 725 | TNF       | Hs.241570 | 7124  | Tumor necrosis factor (TNF superfamily, member 2)                                                        |
| 726 | TNFAIP1   | Hs.76090  | 7126  | Tumor necrosis factor, alpha-induced protein 1 (endothelial)                                             |
| 727 | TNFRSF10B | Hs.521456 | 8795  | Tumor necrosis factor receptor superfamily, member 10b                                                   |
| 728 | TNFRSF10C | Hs.655801 | 8794  | Tumor necrosis factor receptor superfamily, member 10c, decoy without an intracellular domain            |
| 729 | TNFRSF10D | Hs.213467 | 8793  | Tumor necrosis factor receptor superfamily, member 10d, decoy with truncated death domain                |
| 730 | TNFRSF11A | Hs.204044 | 8792  | Tumor necrosis factor receptor superfamily, member 11a, NFkB activator                                   |
| 731 | TNFRSF11B | Hs.81791  | 4982  | Tumor necrosis factor receptor superfamily, member 11b (osteoprotegerin)                                 |
| 732 | TNFRSF12A | Hs.355899 | 51330 | Tumor necrosis factor receptor superfamily, member 12A                                                   |
| 733 | TNFRSF13B | Hs.158341 | 23495 | Tumor necrosis factor receptor superfamily, member 13B                                                   |
| 734 | TNFRSF14  | Hs.512898 | 8764  | Tumor necrosis factor receptor superfamily, member 14 (herpesvirus entry mediator)                       |
| 735 | TNFRSF17  | Hs.2556   | 608   | Tumor necrosis factor receptor superfamily, member 17                                                    |
| 736 | TNFRSF1A  | Hs.279594 | 7132  | Tumor necrosis factor receptor superfamily, member 1A                                                    |
| 737 | TNFRSF1B  | Hs.256278 | 7133  | Tumor necrosis factor receptor superfamily, member 1B                                                    |
| 738 | TNFRSF21  | Hs.443577 | 27242 | Tumor necrosis factor receptor superfamily, member 21                                                    |
| 739 | TNFRSF25  | Hs.462529 | 8718  | Tumor necrosis factor receptor superfamily, member 25                                                    |
| 740 | TNFRSF4   | Hs.129780 | 7293  | Tumor necrosis factor receptor superfamily, member 4                                                     |
| 741 | TNFRSF8   | Hs.1314   | 943   | Tumor necrosis factor receptor superfamily, member 8                                                     |
| 742 | TNFRSF9   | Hs.654459 | 3604  | Tumor necrosis factor receptor superfamily, member 9                                                     |
| 743 | TNFSF10   | Hs.478275 | 8743  | Tumor necrosis factor (ligand) superfamily, member 10                                                    |
| 744 | TNFSF11   | Hs.333791 | 8600  | Tumor necrosis factor (ligand) superfamily, member 11                                                    |
| 745 | TNFSF12   | Hs.54673  | 8742  | Tumor necrosis factor (ligand) superfamily, member 12                                                    |
| 746 | TNFSF13   | Hs.54673  | 8741  | Tumor necrosis factor (ligand) superfamily, member 13                                                    |
| 747 | TNFSF14   | Hs.129708 | 8740  | Tumor necrosis factor (ligand) superfamily, member 14                                                    |
| 748 | TNFSF15   | Hs.241382 | 9966  | Tumor necrosis factor (ligand) superfamily, member 15                                                    |
| 749 | TNFSF18   | Hs.248197 | 8995  | Tumor necrosis factor (ligand) superfamily, member 18                                                    |
| 750 | TNFSF4    | Hs.181097 | 7292  | Tumor necrosis factor (ligand) superfamily, member 4 (tax-transcriptionally activated glycoprotein 1, 3) |
| 751 | TNFSF8    | Hs.654445 | 944   | Tumor necrosis factor (ligand) superfamily, member 8                                                     |
| 752 | TNFSF9    | Hs.1524   | 8744  | Tumor necrosis factor (ligand) superfamily, member 9                                                     |
| 753 | TOLLIP    | Hs.368527 | 54472 | Toll interacting protein                                                                                 |

|     |         |           |        |                                                                                       |
|-----|---------|-----------|--------|---------------------------------------------------------------------------------------|
| 754 | TPD52   | Hs.368433 | 7163   | Tumor protein D52                                                                     |
| 755 | TRAF2   | Hs.522506 | 7186   | TNF receptor-associated factor 2                                                      |
| 756 | TRAF6   | Hs.591983 | 7189   | TNF receptor-associated factor 6                                                      |
| 757 | TRAT1   | Hs.138701 | 50852  | T cell receptor associated transmembrane adaptor 1                                    |
| 758 | TRBC1   | -         | 28639  | T cell receptor beta constant 1                                                       |
| 759 | TREM1   | Hs.283022 | 54210  | Triggering receptor expressed on myeloid cells 1                                      |
| 760 | TREM2   | Hs.435295 | 54209  | Triggering receptor expressed on myeloid cells 2                                      |
| 761 | TRGV5   | -         | 6978   | T cell receptor gamma variable 5                                                      |
| 762 | TRIM10  | Hs.274295 | 10107  | Tripartite motif-containing 10                                                        |
| 763 | TRIM22  | Hs.501778 | 10346  | Tripartite motif-containing 22                                                        |
| 764 | TRPC4AP | Hs.168073 | 26133  | Transient receptor potential cation channel, subfamily C, member 4 associated protein |
| 765 | TUBB    | Hs.636480 | 203068 | Tubulin, beta                                                                         |
| 766 | TUBB2C  | Hs.433615 | 10383  | Tubulin, beta 2C                                                                      |
| 767 | TUBB3   | Hs.511743 | 10381  | Tubulin, beta 3                                                                       |
| 768 | TXLNA   | Hs.699306 | 200081 | Taxilin alpha                                                                         |
| 769 | TYROBP  | Hs.515369 | 7305   | TYRO protein tyrosine kinase binding protein                                          |
| 770 | UBE2N   | Hs.524630 | 7334   | Ubiquitin-conjugating enzyme E2N (UBC13 homolog, yeast)                               |
| 771 | ULBP2   | Hs.656778 | 80328  | UL16 binding protein 2                                                                |
| 772 | VAMP7   | Hs.24167  | 6845   | Vesicle-associated membrane protein 7                                                 |
| 773 | VCAM1   | Hs.109225 | 7412   | Vascular cell adhesion molecule 1                                                     |
| 774 | VEGFA   | Hs.73793  | 7422   | Vascular endothelial growth factor A                                                  |
| 775 | VEGFB   | Hs.78781  | 7423   | Vascular endothelial growth factor B                                                  |
| 776 | VEGFC   | Hs.435215 | 7424   | Vascular endothelial growth factor C                                                  |
| 777 | VIPR1   | Hs.348500 | 7433   | Vasoactive intestinal peptide receptor 1                                              |
| 778 | VPREB1  | Hs.247979 | 7441   | Pre-B lymphocyte gene 1                                                               |
| 779 | VTCN1   | Hs.546434 | 79679  | V-set domain containing T cell activation inhibitor 1                                 |
| 780 | VTN     | Hs.2257   | 7448   | Vitronectin                                                                           |
| 781 | WAS     | Hs.2157   | 7454   | Wiskott-Aldrich syndrome (eczema-thrombocytopenia)                                    |
| 782 | XBP1    | Hs.437638 | 7494   | X-box binding protein 1                                                               |
| 783 | XCL1    | Hs.546295 | 6375   | Chemokine (C motif) ligand 1                                                          |
| 784 | XCR1    | Hs.248116 | 2829   | Chemokine (C motif) receptor 1                                                        |
| 785 | YTHDF2  | Hs.532286 | 51441  | YTH domain family, member 2                                                           |
| 786 | ZAP70   | Hs.234569 | 7535   | Zeta-chain (TCR) associated protein kinase 70kDa                                      |
| 787 | ZBTB16  | Hs.591945 | 7704   | Zinc finger and BTB domain containing 16                                              |
| 788 | ZEB1    | Hs.124503 | 6935   | Zinc finger E-box binding homeobox 1                                                  |
| 789 | ZNF160  | Hs.655967 | 90338  | Zinc finger protein 160                                                               |
| 790 | ZNF3    | Hs.435302 | 7551   | Zinc finger protein 3                                                                 |
| 791 | ZNF675  | Hs.264345 | 171392 | Zinc finger protein 675                                                               |

**Supplementary Table 1: List of IA genes.**

| Gene          | Probe              | p value<br>Step-cox | p value<br>quartile<br>method | p value<br>classical<br>cox | 6-IA gene-<br>Risk |
|---------------|--------------------|---------------------|-------------------------------|-----------------------------|--------------------|
| <b>ACVR2A</b> | <b>205327_s_at</b> | <b>&lt;1.0E-4</b>   | <b>1.53E-4</b>                | <b>1.3E-3</b>               | <b>yes</b>         |
| <b>ARG1</b>   | <b>206177_s_at</b> | <b>&lt;1.0E-4</b>   | <b>1.99E-3</b>                |                             | <b>yes</b>         |
| <b>CD22</b>   | <b>204581_at</b>   | <b>&lt;1.0E-4</b>   | <b>&lt;1.0E-4</b>             | <b>3.8E-3</b>               | <b>yes</b>         |
| <b>FGF2</b>   | <b>204422_s_at</b> |                     | <b>3.39E-3</b>                | <b>4.9E-3</b>               | <b>yes</b>         |
| <b>MNX1</b>   | <b>214614_at</b>   | <b>&lt;1.0E-4</b>   | <b>4.88E-3</b>                | <b>4.0E-4</b>               | <b>yes</b>         |
| <b>RPS19</b>  | <b>213414_s_at</b> |                     | <b>3.87E-4</b>                |                             | <b>yes</b>         |
| ADAMDEC1      | 206134_at          | <1.0E-4             |                               |                             |                    |
| ADIPOQ        | 207175_at          | <1.0E-4             |                               |                             |                    |
| BCL11A        | 219497_s_at        |                     |                               | 9.8E-4                      |                    |
| BLNK          | 207655_s_at        |                     |                               | 3.7E-3                      |                    |
| BMPR1A        | 213578_at          |                     | <1.0E-4                       |                             |                    |
| BNIP3L        | 221478_at          |                     | 3.95E-3                       |                             |                    |
| C1QBP         | 214214_s_at        |                     | 9.47E-3                       |                             |                    |
| C5AR1         | 220088_at          | <1.0E-4             |                               |                             |                    |
| CALCA         | 217495_x_at        |                     | 1.87E-3                       |                             |                    |
| CARTPT        | 206339_at          |                     | 4.65E-4                       |                             |                    |
| CCBP2         | 206887_at          |                     |                               | 7.2E-3                      |                    |
| CCL15         | 210390_s_at        | 9.0E-4              |                               |                             |                    |
| CCL17         | 207900_at          | <1.0E-4             | 5.79E-3                       |                             |                    |
| CCR10         | 220565_at          | <1.0E-4             |                               |                             |                    |
| CD19          | 206398_s_at        | <1.0E-4             |                               |                             |                    |
| CD1E          | 215784_at          | <1.0E-4             |                               |                             |                    |
| CD247         | 210031_at          |                     | 3.34E-3                       |                             |                    |
| CD70          | 206508_at          |                     | 1.86E-3                       |                             |                    |
| CD79B         | 205297_s_at        |                     | 9.43E-3                       |                             |                    |
| CDKN2A        | 211156_at          | <1.0E-4             |                               |                             |                    |
| CFP           | 206380_s_at        |                     |                               | 8.7E-3                      |                    |
| CHIT1         | 208168_s_at        |                     |                               | 4.4E-3                      |                    |
| CLEC10A       | 206682_at          | 1.4E-3              |                               |                             |                    |
| CRHR1         | 214619_at          |                     | 5.94E-4                       |                             |                    |
| CSF1          | 209716_at;         |                     |                               |                             |                    |
|               | 207082_at;         |                     |                               | 1.6E-3                      |                    |
|               | 211839_s_at        |                     |                               |                             |                    |
| CSF1R         | 203104_at          |                     |                               | 1.7E-3                      |                    |
| CSF2RA        | 210340_s_at        |                     |                               | 4.7E-3                      |                    |
| CTSG          | 205653_at          | <1.0E-4             |                               |                             |                    |
| CX3CL1        | 203687_at;         |                     |                               |                             |                    |
|               | 823_at             |                     |                               | 7.4E-4                      |                    |
| CX3CR1        | 205898_at          |                     |                               | 1.5E-3                      |                    |
| CXADR         | 203917_at          |                     |                               | 7.7E-3                      |                    |
| CXCL11        | 211122_s_at        | 2.0E-3              |                               |                             |                    |
| CXCR4         | 217028_at          | 2.0E-4              |                               |                             |                    |

|            |                           |          |         |        |
|------------|---------------------------|----------|---------|--------|
| DHRS2      | 214079_at                 | <1.0E-4  |         |        |
| EDNRB      | 204271_s_at               |          | <1.0E-4 | 7.2E-3 |
| ERAP1      | 214012_at                 |          | 6.89E-3 |        |
| EXOSC9     | 205061_s_at               |          |         | 6.0E-3 |
| CD89       | 211307_s_at               | 6.0E-4   |         |        |
| FCGR1B/ C  | 214511_x_at               |          | 9.67E-3 |        |
| FCGRT      | 218831_s_at               |          |         | 8.1E-3 |
| FGF12      | 214589_at                 |          | 8.49E-3 |        |
| FGF17      | 221376_at                 | <1.0E-4  |         |        |
| FGFR2      | 208225_at                 |          |         | 3.6E-3 |
| FOXO3      | 217399_s_at               |          |         | 9.0E-3 |
| FYN        | 216033_s_at               | <1.0E-4  |         |        |
| GPR183     | 205419_at                 | 3.62 E-3 |         |        |
| HDAC9      | 205659_at                 | <1.0E-4  |         |        |
| HGF        | 210998_s_at               | <1.0E-4  |         |        |
| HIF1A      | 200989_at                 |          | 1.46E-3 |        |
| HMGB1      | 200679_x_at               |          | 9.37E-3 |        |
| HSP90AA1   | 211969_at                 | <1.0E-4  |         |        |
| ICOSLG     | 213450_s_at               | <1.0E-4  |         |        |
| IGHD/IGHG1 | 215621_s_at               | <1.0E-4  |         |        |
| IGLL1      | 213502_x_at               | <1.0E-4  |         |        |
| IGSF6      | 206420_at                 |          | 6.12E-3 |        |
| IKBKG      | 36004_at                  |          | 8.49E-3 |        |
| IL1B       | 205067_at                 |          |         | 5.1E-3 |
| IL21R      | 221658_s_at               |          | 3.89E-3 | 7.6E-3 |
| IL33       | 209821_at                 |          | 9.55E-3 |        |
| IL4        | 207539_s_at               | <1.0E-4  |         |        |
| IL5        | 207952_at                 | <1.0E-4  | 5.60E-3 |        |
| IL6ST      | 204863_s_at               |          | 3.77E-3 | 7.2E-3 |
| INHBA      | 210511_s_at               | 4.0E-4   |         |        |
| JAG2       | 209784_s_at               |          | 5.33E-3 |        |
| KIR2DL1    | 208179_x_at               | <1.0E-4  |         |        |
| KIR2DL4    | 208426_x_at               | <1.0E-4  |         |        |
| KIR3DL3    | 216676_x_at               | <1.0E-4  |         |        |
| LDB1       | 35160_at                  |          | 5.53E-3 |        |
| LTB4R      | 216388_s_at               | <1.0E-4  |         |        |
| LYN        | 210754_s_at;<br>202625_at |          |         | 4.6E-3 |
| MAP4K2     | 204936_at                 |          | <1.0E-4 |        |
| MET        | 203510_at                 |          | 4.22E-3 |        |
| MS4A1      | 217418_x_at               |          | 6.27E-3 |        |
| MYST3      | 216361_s_at               | <1.0E-4  |         |        |
| NCF1B      | 214084_x_at               | <1.0E-4  |         |        |
| NCK1       | 211063_s_at               | <1.0E-4  | <1.0E-4 |        |
| NOS2A      | 210037_s_at               | <1.0E-4  |         |        |
| PDGFC      | 218718_at                 |          | 1.14E-3 | 2.3E-3 |



|             |             |         |         |        |
|-------------|-------------|---------|---------|--------|
| PML         | 211013_x_at | 2.45E-3 | 1.92E-3 |        |
| POU2F2      | 211771_s_at | <1.0E-4 |         |        |
| PPARG       | 208510_s_at | <1.0E-4 |         |        |
| PTCRA       | 211837_s_at | <1.0E-4 |         |        |
| RBP4        | 219140_s_at |         | 2.78E-3 |        |
| RELA        | 209878_s_at |         |         | 7.4E-3 |
| RPS14       | 208645_s_at |         | 7.73E-3 |        |
| S1PR4       | 206437_at   | <1.0E-4 |         |        |
| SCYE1       | 202541_at   |         | 2.53E-3 |        |
| SERPINB4    | 211906_s_at | <1.0E-4 |         |        |
| SMAD3       | 218284_at   |         |         | 3.9E-3 |
| TAPBP       | 210294_at   |         | 2.54E-3 |        |
| TGFB1       | 203084_at   |         | 6.74E-3 |        |
| TM7SF4      | 221266_s_at | <1.0E-4 |         |        |
| TNFRSF25    | 211841_s_at |         | 1.65E-4 |        |
| TNFRSF6B    | 206092_x_at |         | 5.32E-3 |        |
| TNFSF12/ 13 | 205611_at   |         | 8.34E-3 | 8.6E-3 |
| TPD52       | 201688_s_at | <1.0E-4 |         |        |
| TRIM10      | 210579_s_at | <1.0E-4 |         |        |
| TUBB3/2C    | 202154_x_at | <1.0E-4 |         |        |
| ULBP2       | 221291_at   | <1.0E-4 | 2.44E-3 |        |
| VEGFC       | 209946_at   | <1.0E-4 |         |        |
| VTCN1       | 219768_at   | <1.0E-4 |         |        |
| ZEB1        | 212758_s_at |         | <1.0E-4 |        |

**Supplementary Table 2:** IA genes associated with survival in the 3 statistical methods.
